# Supplementary material for: Synergistic effect of GO/SrFe12O19 as magnetic hybrid nanocatalyst for regioselective ring-opening of epoxides with amines under eco-friendly conditions
Source: Royal Society of Chemistry journal article supplement (doi:10.1039/d2ra00984f), 2022-01-01
Supplement: d2ra00984f1.pdf [file d2ra00984f1.pdf]

## SUPPORTING INFORMATION

### **Synergistic effect of GO/SrFe<sub>12</sub>O<sub>19</sub> as magnetic hybrid nanocatalyst for regioselective ring-opening of epoxides with amines under eco-friendly conditions**

Mouhsine LAAYATI<sup>1,2</sup>, Ayoub Abdelkader MEKKAOUI<sup>1,2</sup>, Lahcen FKHAR<sup>2</sup>, Mustapha AIT ALI<sup>2</sup>, Hafid ANANE<sup>3</sup>, Lahoucine BAHISIS<sup>3,4</sup>, Larbi EL FIRDOUSSI<sup>2</sup>, Soufiane EL HOUSSAME<sup>1,\*</sup>

<sup>1</sup> Laboratoire des Sciences des Matériaux, Mathématiques et Environnement, Université Sultan Moulay Slimane, Faculté Polydisciplinaire de Khouribga, BP 145, Khouribga 25000, Morocco.

<sup>2</sup> Laboratoire de chimie moléculaire, Equipe de Chimie de Coordination et de Catalyse, Département de Chimie, Faculté des Sciences Semlalia, BP 2390, Marrakech 40001, Morocco.

<sup>3</sup> Laboratoire de Chimie Analytique et Moléculaire, LCAM, Faculté Polydisciplinaire de Safi, Université Cadi Ayyad, Safi 46030, Morocco.

<sup>4</sup> Laboratoire de Chimie de Coordination et d'Analytique (LCCA), Département de Chimie, Faculté des Sciences d'El Jadida, Université Chouaïb Doukkali, El Jadida, Morocco.

\* Corresponding author:

Tel.: +212 523 490359; fax: +212 523 490354. E-mail address:  
[hous\\_soufiane@hotmail.com](mailto:hous_soufiane@hotmail.com)

#### **Contents:**

**A- Spectral data of β-aminoalcohol compounds**

**B- Cartesian coordinates and energy for all optimized geometries**

## A- Spectral data of $\beta$ -aminoalcohol compounds

**2-phenyl-2-(phenylamino)ethanol:**  $^1\text{H}$  NMR ( $\text{CDCl}_3$ , 300 MHz)  $\delta$  1.13-1.25 (m, 1 H), 3.11 (s, 1 H), 3.74 (td, 2 H,  $J = 10.0, 8.9, 5.1$  Hz), 4.33 (dt,  $J = 6.9, 3.4$  Hz, 1 H), 6.38 (m, 2 H), 6.55 (td,  $J = 7.3, 3.6$  Hz, 1 H), 6.97 (ddd,  $J = 9.9, 5.9, 2.3$  Hz, 2 H), 7.08-7.21 (m, 5 H).  $^{13}\text{C}$  NMR ( $\text{CDCl}_3$ , 75 MHz)  $\delta$  59.98, 67.16, 114.01, 117.98, 126.85, 127.65, 128.87, 129.27, 140.30, 147.4.

**2-(phenylamino)-1-phenylethanol:**  $^1\text{H}$  NMR ( $\text{CDCl}_3$ , 300 MHz)  $\delta$  3.27-3.37 (m, 1 H), 3.44-3.50 (m, 1H), 4.94 (dd,  $J = 7.3, 4.0$  Hz, 1H), 5.29 (s, 1H), 6.60-6.70 (m, 2H), 6.70-6.94 (m, 2H), 7.13-7.32 (m, 1H), 7.26-7.54 (m, 5H).  $^{13}\text{C}$  NMR ( $\text{CDCl}_3$ , 75 MHz)  $\delta$  51.91, 72.45, 113.70, 118.30, 126.05, 128.07, 128.72, 129.48, 142.22, 147.94.

**2-((2-fluorophenyl)amino)-1-phenylethanol:**  $^1\text{H}$  NMR ( $\text{CDCl}_3$ , 300 MHz)  $\delta$  2.17(s, 1H), 2.19 (s,1H), 3.32-3.49 (m, 2H), 4.96(dd,  $J = 8.5, 4$  Hz,1H), 6.62-6.85 (m, 2H), 6.94-7.08 (m ,1H), 7.28-7.49(m, 6H).  $^{13}\text{C}$  NMR ( $\text{CDCl}_3$ , 75 MHz)  $\delta$  51.46, 72.56, 112.71, 114.79, 117.41, 124.58, 125.89, 128.10, 128.68, 136.22, 141.85, 153.47.

**2-((2-fluorophenyl)amino)-2-phenylethanol:**  $^1\text{H}$  NMR ( $\text{CDCl}_3$ , 300 MHz)  $\delta$  1.96 (s, 1H), 3.80-3.91 (m, 2H),4.45 (dd,  $J = 7.2, 4.2$  Hz, 1H), 6.40 (td,  $J = 8.4, 1.6$  Hz, 1H), 6.46-6.59 (m, 1H), 6.69-6.80 (m, 1H), 6.82 (s, 1H), 6.9 (ddd,  $J = 11.8, 8.0, 1.5$  Hz, 1H), 7.10-7.34 (m, 5H).  $^{13}\text{C}$  NMR ( $\text{CDCl}_3$ , 75 MHz)  $\delta$  59.81, 67.25, 113.75, 114.57, 117.38, 124.43, 126.70, 127.75, 128.88, 135.60, 139.80, 153.51.

**2-((2-chlorophenyl)amino)-1-phenylethanol:**  $^1\text{H}$  NMR ( $\text{CDCl}_3$ , 300 MHz)  $\delta$  0.92 (s, 1H), 2.07-2.20 (m, 1H), 3.31-3.53 (m, 2H), 4.97 (dd,  $J = 8.3, 4.2$ , 1H), 6.60-6.79 (m, 2H), 6.99-7.22 (m,1H), 7.22-7.34 (m, 1H), 7.29-7.50 (m, 5H).  $^{13}\text{C}$  NMR ( $\text{CDCl}_3$ , 75 MHz)  $\delta$  51.37, 72.47, 111.72, 117.86, 119.77, 125.90, 127.83, 128.12, 128.69, 129.32, 141.86, 143.78.

**2-((2-chlorophenyl)amino)-2-phenylethanol:**  $^1\text{H}$  NMR ( $\text{CDCl}_3$ , 300 MHz)  $\delta$  1.29 (s, 1H), 3.84 (ddd,  $J = 11.2, 6.8, 0.8$  Hz, 1H), 4.00 (dd,  $J = 11.2, 4.3$  Hz, 1H), 4.58 (dd,  $J = 6.8, 4.2$  Hz, 1H), 6.47 (dd,  $J = 8.2, 1.4$  Hz, 1H), 6.63 (td,  $J = 7.6, 1.4$  Hz, 1H), 6.91-7.05 (m, 3H), 7.22-7.41 (m,4H).  $^{13}\text{C}$  NMR ( $\text{CDCl}_3$ , 75 MHz)  $\delta$  59.72, 67.32, 112.91, 117.87, 119.78, 126.67, 127.65, 127.79, 128.91, 129.12, 139.53, 143.03.

**2-((2-bromophenyl)amino)-1-phenylethanol:**  $^1\text{H}$  NMR ( $\text{CDCl}_3$ , 300 MHz)  $\delta$  0.94 (m, 1H), 3.29-3.53 (m, 2H), 4.96 (dd,  $J = 8.3, 4.2$  Hz, 1H), 6.6 (t,  $J = 2.5$  Hz, 1H), 6.63 (d,  $J = 1.5$  Hz, 1H), 6.64-6.77 (m, 1H), 7.13-7.27 (m, 1H), 7.36-7.51 (m, 5H), 7.32-7.42 (m,

1H). <sup>13</sup>C NMR (CDCl<sub>3</sub>, 75 MHz) δ 51.5, 72.44, 110.36, 111.80, 118.39, 125.92, 128.14, 128.52, 128.70, 132.6, 141.83, 144.76.

**2-((2-bromophenyl)amino)-2-phenylethanol:** <sup>1</sup>H NMR (CDCl<sub>3</sub>, 300 MHz) δ 1.23-1.36 (m, 1H), 3.83 (dd, J=11.2, 6.8Hz, 1H), 3.99 (dd, J=11.2, 4.2 Hz, 1H), 4.57 (dd, J=6.8, 4.2Hz, 1H), 6.45 (dd, J= 8.2, 1.5 Hz, 1H), 6.57 (td, J= 7.6, 1.5 Hz, 1H), 7.02 (ddd, J=8.1, 7.3, 1.5Hz, 1H), 7.23-7.40 (m, 4H), 7.39 (s, 1H), 7.46 (dd, J=7.9, 1.5Hz, 1H). <sup>13</sup>C NMR (CDCl<sub>3</sub>, 75 MHz) δ 59.89, 67.30, 110.39, 113.04, 118.41, 126.67, 127.78, 128.36, 128.91, 132.41, 139.53, 144.03.

**2-(morpholin-4-yl)-1-phenylethanol :** <sup>1</sup>H NMR (CDCl<sub>3</sub>, 300 MHz) δ 1.98-2.20 (m, 1H), 2.64-2.40 (m, 3H), 2.71-2.82 (m, 1H), 3.20 (s, 1H), 3.51-4.03 (m, 4H), 4.76 (dt, J= 7.3, 3.7 Hz, 1H), 5.23-5.33 (m, 1H), 7.15-7.45 (m, 5H). <sup>13</sup>C NMR (CDCl<sub>3</sub>, 75 MHz) δ 53.46, 60.77, 66.98, 68.64, 125.84, 127.58, 128.38, 141.83

**2-phenyl-2-(pyrrolidin-1-yl)ethanol:** <sup>1</sup>H NMR (CDCl<sub>3</sub>, 300 MHz) δ 1.67-1.89 (m, 4H), 2.69-2.83 (m, 4H), 3.36-3.43 (m, 2H), 3.77-3.90 (m, 1H), 7.23-7.42 (m, 5H). <sup>13</sup>C NMR (CDCl<sub>3</sub>, 75 MHz) δ 23.17, 51.57, 64.64, 70.54, 126.23, 127.46, 128.63, 139.90.

**1-phenyl-2-(pyrrolidin-1-yl)ethanol:** <sup>1</sup>H NMR (CDCl<sub>3</sub>, 300 MHz) δ 1.67-1.89 (m, 4H), 2.41-2.64 (m, 4H), 2.71 (dd, J=5.5, 3.0Hz, 2H), 4.3 (s, 1H), 4.73 (dd, J=10.4, 3.2Hz, 1H), 7.2-7.45 (m, 5H). <sup>13</sup>C NMR (CDCl<sub>3</sub>, 75 MHz) δ 23.66, 53.99, 64.41, 70.97, 125.90, 127.35, 128.26, 142.82.

**2-(benzylamino)-2-phenylethanol:** <sup>1</sup>H NMR (CDCl<sub>3</sub>, 300 MHz) δ 1.92-2.01 (m, 1H), 3.49-3.67 (m, 2H), 3.83 (s, 2H), 4.36-4.50 (m, 1H), 7.21-7.51 (m, 10H). <sup>13</sup>C (CDCl<sub>3</sub>, 75 MHz) δ 51.12, 56.73, 63.96, 66.73, 127.59, 128.53, 139.79, 140.25, 142.60.

**2-(benzylamino)-1-phenylethanol:** <sup>1</sup>H NMR (CDCl<sub>3</sub>, 300 MHz) δ 2.17 (d, J=5.8Hz, 1H), 2.74-2.91 (m, 1H), 3.53-3.89 (m, 2H), 4.32 (s, 1H), 4.67-4.92 (m, 1H), 7.31-7.39 (m, 10H). <sup>13</sup>C (CDCl<sub>3</sub>, 75 MHz) δ 53.10, 56.11, 71.48, 125.95, 126.09, 127.59, 128.43, 128.53, 128.70, 138.34, 142.60.

**2-(phenylamino)-cyclohexanol:** <sup>1</sup>H NMR (CDCl<sub>3</sub>, 300 MHz) δ 0.94-1.26 (m, 4H), 1.58-1.67 (m, 2H), 1.97-2.04 (m, 2H), 3.0 (ddd, 1H, j= 11.1, 9.1, 4.0 Hz), 3.09 (s, 1H), 3.22 (td, 1H, J = 9.8, 4.3 Hz), 6.54-6.68 (m, 3H), 7.04-7.14 (m, 2H). <sup>13</sup>C NMR (CDCl<sub>3</sub>, 75 MHz) δ 24.36, 24.99, 31.59, 33.4, 60.04, 74.38, 114.36, 118.2, 129.36, 147.98.

**2-((2-fluorophenyl)amino)cyclohexanol:** <sup>1</sup>H NMR (CDCl<sub>3</sub>, 300 MHz) δ 0.69-1.01 (m, 1H), 1.01-1.57 (m, 4H), 1.57-1.96 (m, 2H), 1.96-2.24 (m, 2H), 2.89-3.37 (m, 2H), 3.43 (td, J= 7.6, 1.5 Hz, 1H), 4.13 (ddd, J= 10.2, 8.4, 4.3 Hz, 1H), 6.56-6.78 (m, 1H), 6.78-

7.09 (m, 1H), 7.09-7.36 (m, 2H). <sup>13</sup>C NMR (CDCl<sub>3</sub>, 75 MHz) δ 24.22, 24.98, 31.64, 33.17, 59.89, 74.46, 113.84, 114.84, 117.70, 124.62, 136.04, 150.43.

**2-((2-chlorophenyl)amino)cyclohexanol:** <sup>1</sup>H NMR (CDCl<sub>3</sub>, 300 MHz) δ 0.67-0.94 (m, 2H), 1.00-1.44 (m, 3H), 1.53-1.77 (m, 1H), 1.90-2.31 (m, 2H), 3.13 (ddd, J=10.8, 9.0, 4.0Hz, 1H), 3.39 (ddd, J=10.2, 8.4, 4.3Hz, 1H), 4.07(s,1H), 5.2 (S, 1H), 6.49-6.65 (m, 1H), 6.77 (dd, J=8.3, 1.5Hz,1H), 6.97-7.15 (m, 1H), 7.11-7.23 (m, 1H). <sup>13</sup>C NMR (CDCl<sub>3</sub>, 75 MHz) δ 24.2, 24.95, 31.68, 33.16, 59.83, 74.54, 112.85, 118.04, 120.26, 127.82, 129.32, 143.81.

**2-((2-bromophenyl)amino)cyclohexanol:** <sup>1</sup>H NMR (CDCl<sub>3</sub>, 300 MHz) δ 7.43 (dd, J=7.9, 1.5Hz, 1H), 7.17 (ddd, J=8.5, 7.3, 1.5Hz, 1H), 6.84 (dd, J=8.3, 1.5Hz, 1H), 6.60 (td, J=7.6, 1.5Hz, 1H), 4.05 (s, 1H), 3.46 (td, J=9.7, 4.3Hz, 1H), 3.20 (ddd, J=10.7, 9.0, 4.0Hz, 1H), 2.05-2.30 (m, 2H), 1.69-1.81 (m,2H), 1.31-1.49 (m, 2H), 1.29-1.33 (m, 2H), 0.84-0.97 (m, 2H). <sup>13</sup>C NMR (CDCl<sub>3</sub>, 75 MHz) δ 24.19, 24.99, 31.62, 33.24, 59.97, 74.38, 11.02, 113.02, 118.52, 128.52, 132.74, 144.85.

**2-(morpholin-4-yl)cyclohexanol:** <sup>1</sup>H NMR (CDCl<sub>3</sub>, 300 MHz) δ 1.10-1.27 (m, 2H),1.21-1.35 (m,2H), 1.73-1.88 (m, 2H), 2.00-2.31 (m, 1H), 2.44 (ddd, J=11.4, 6.0, 3.4Hz, 2H), 2.66-2.84 m, 4H), 3.99 (td, J=9.6, 4.7Hz, 1H), 3.58-3.82 (m, 4H), 4.36 (s, 1H). <sup>13</sup>C NMR (CDCl<sub>3</sub>, 75 MHz) δ 22.88, 24.00, 25.40, 33.19, 48.73, 67.37, 68.43, 70.48.

**2-(pyrrolidin-1-yl)cyclohexanol:** <sup>1</sup>H NMR (CDCl<sub>3</sub>, 300 MHz) δ 1.03-1.33 (m, 4H), 1.6-1.92 (m, 6H), 1.87-2.15 (m, 2H), 2.46 (td, J=9.7, 4.3Hz, 1H), 2.53-2.80 (m, 4H), 3.25-3.43 (m, 1H), 5.43 (s, 1H). <sup>13</sup>C NMR (CDCl<sub>3</sub>, 75 MHz) δ 21.83, 23.48, 24.11, 25.14, 33.48, 47.67, 65.48, 70.57.

**2-(benzylamino)cyclohexanol:** <sup>1</sup>H NMR (CDCl<sub>3</sub>, 300 MHz) δ 1.38-0.92 (m, 2H), 1.20-1.27 (m, 2H), 1.77-1.64 (m, 2H), 1.85-2.18 (m, 3H), 3.23 (td, J=9.6Hz, 4.5Hz, 1H), 3.33 (s, 2H), 3.67 (d, J=12.9Hz, 1H), 3.93 (d, J=12.9Hz, 1H), 4.23-4.74 (m, 1H), 7.37-7.15 (m, 5H). <sup>13</sup>C (CDCl<sub>3</sub>, 75 MHz) δ 24.39, 24.95, 30.15, 33.59, 50.82, 63.00, 73.43, 127.09, 128.24, 128.45, 140.01

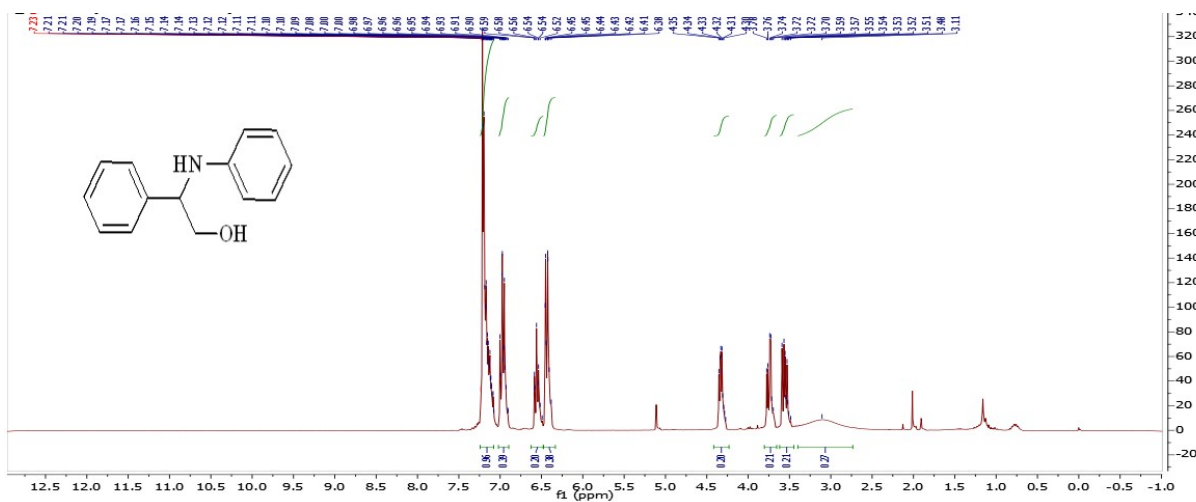

Figure S1:  $^1\text{H}$  NMR spectrum of 2-phenyl-2-(phenylamino)ethanol

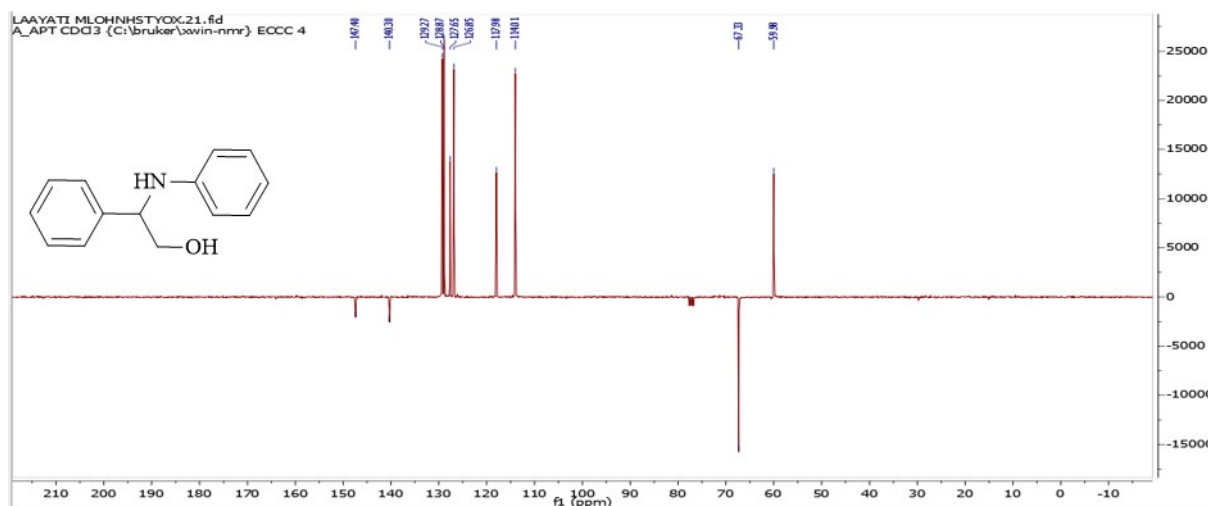

Figure S2: APT spectrum of 2-phenyl-2-(phenylamino)ethanol

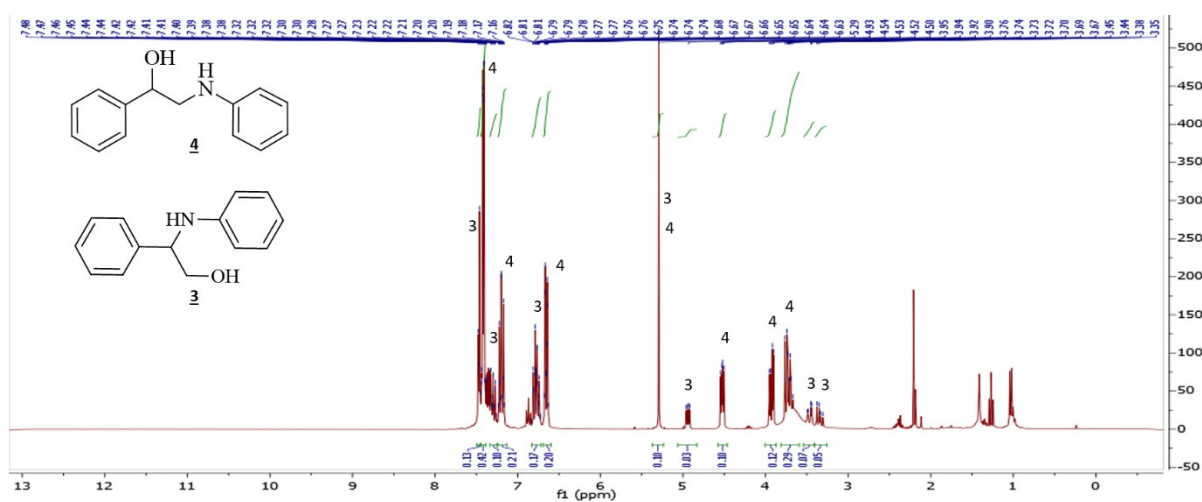

Figure S3:  $^1\text{H}$  NMR spectrum of 2-phenyl-2-(phenylamino)ethanol (**3**) and 2-(phenylamino)-1-phenylethanol (**4**) mixture

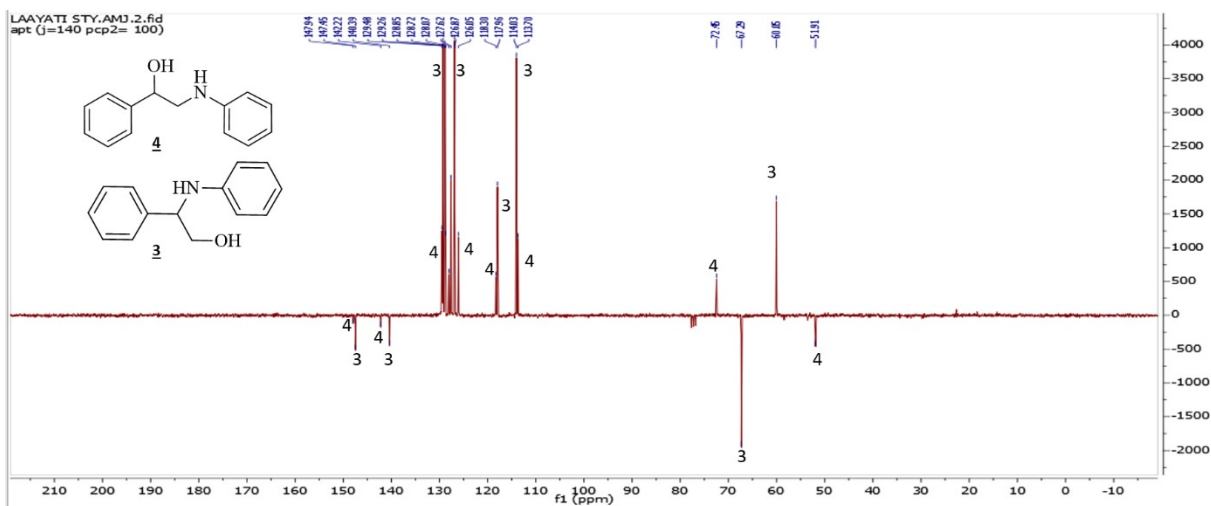

Figure S4: APT spectrum of 2-(phenylamino)-1-phenylethanol (**3**) and 2-phenyl-2-(phenylamino)ethanol (**4**) mixture

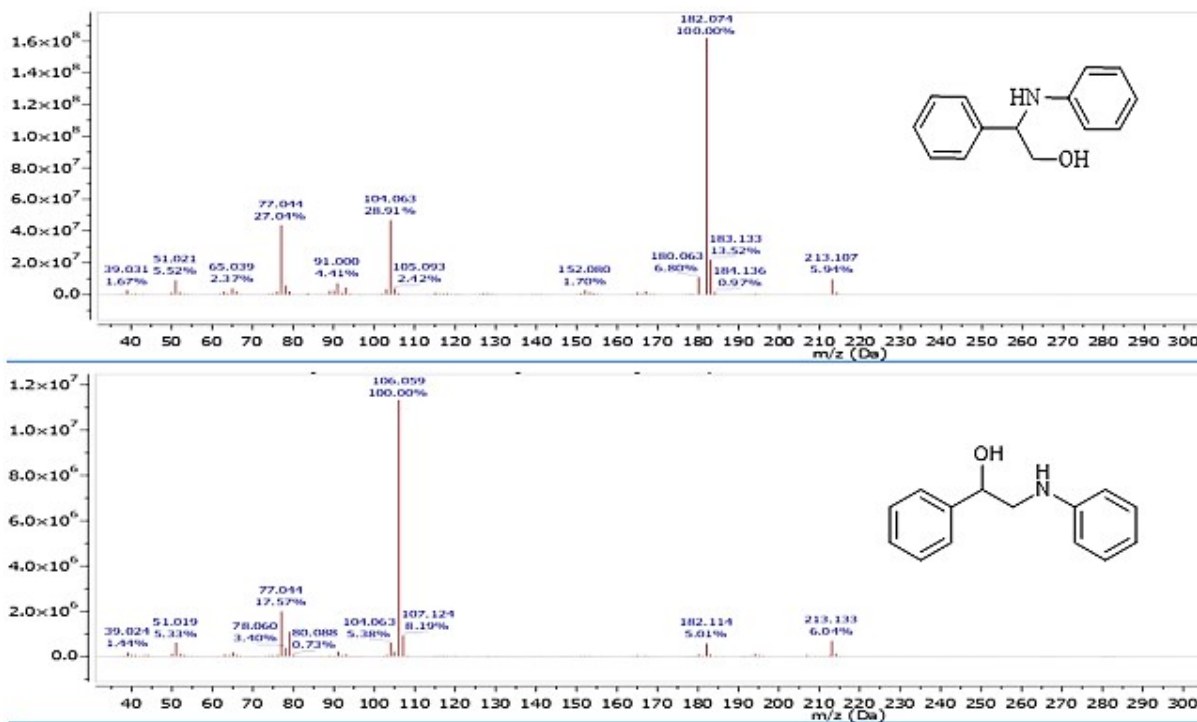

Figure S5: MS spectra of 2-phenyl-2-(phenylamino)ethanol and 1-phenyl-2-(phenylamino)ethanol

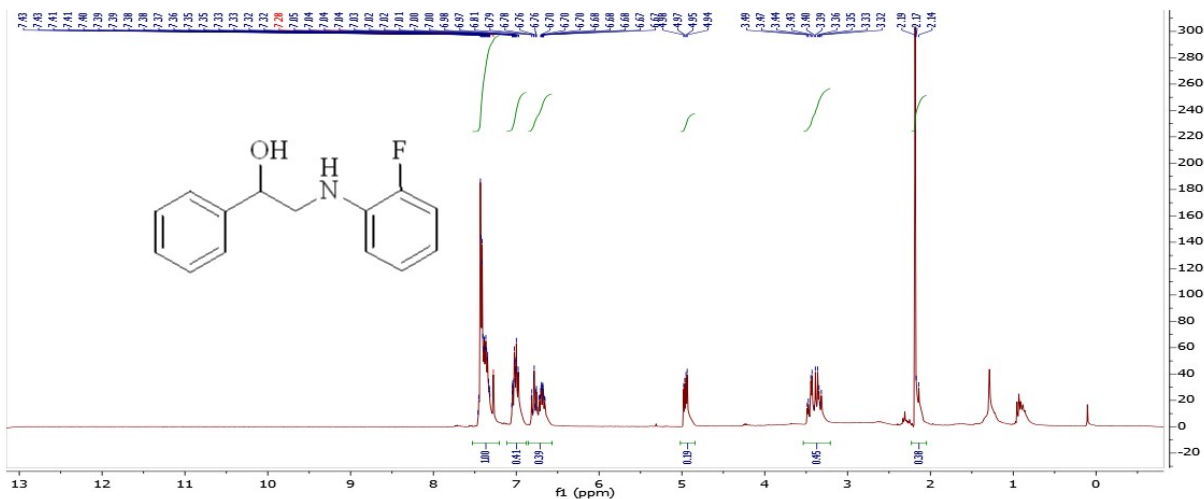

Figure S6:  $^1\text{H}$  NMR spectrum of 2-((2-fluorophenyl)amino)-1-phenylethanol

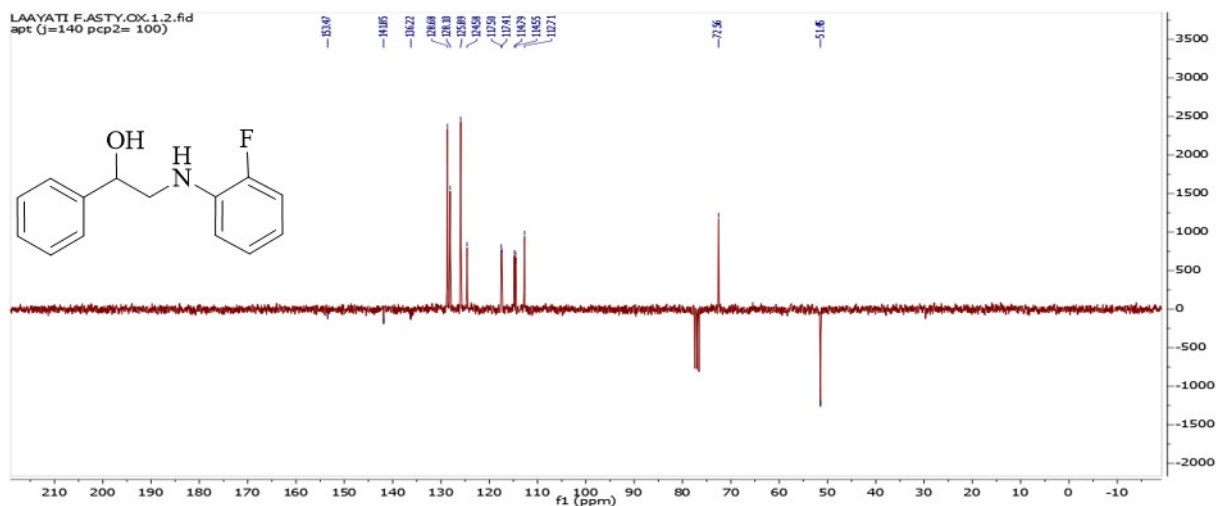

Figure S7: APT spectrum of 2-((2-fluorophenyl)amino)-1-phenylethanol

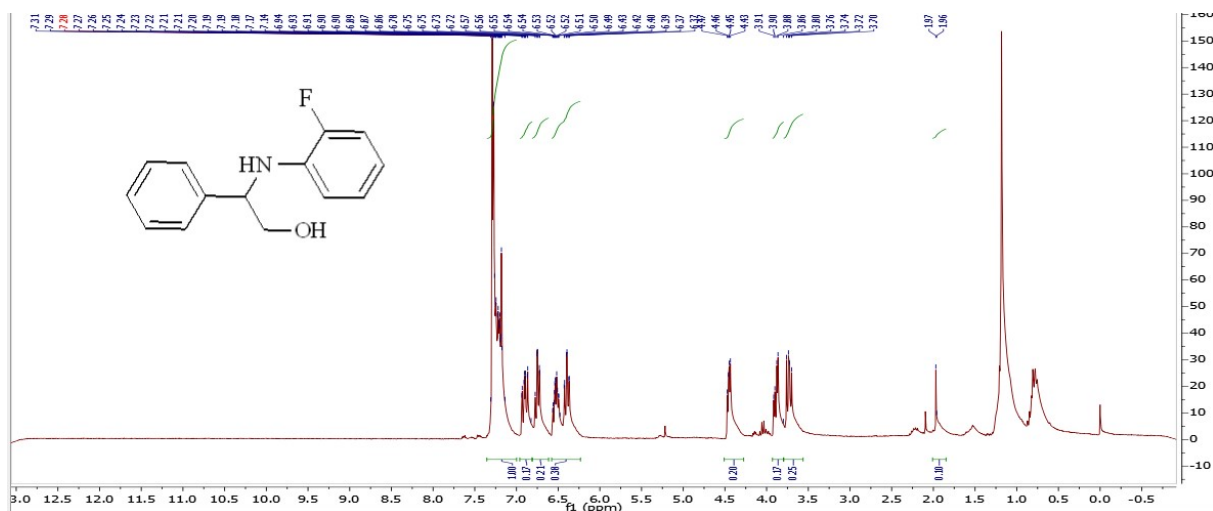

Figure S8:  $^1\text{H}$  NMR spectrum of 2-((2-fluorophenyl)amino)-2-phenylethanol

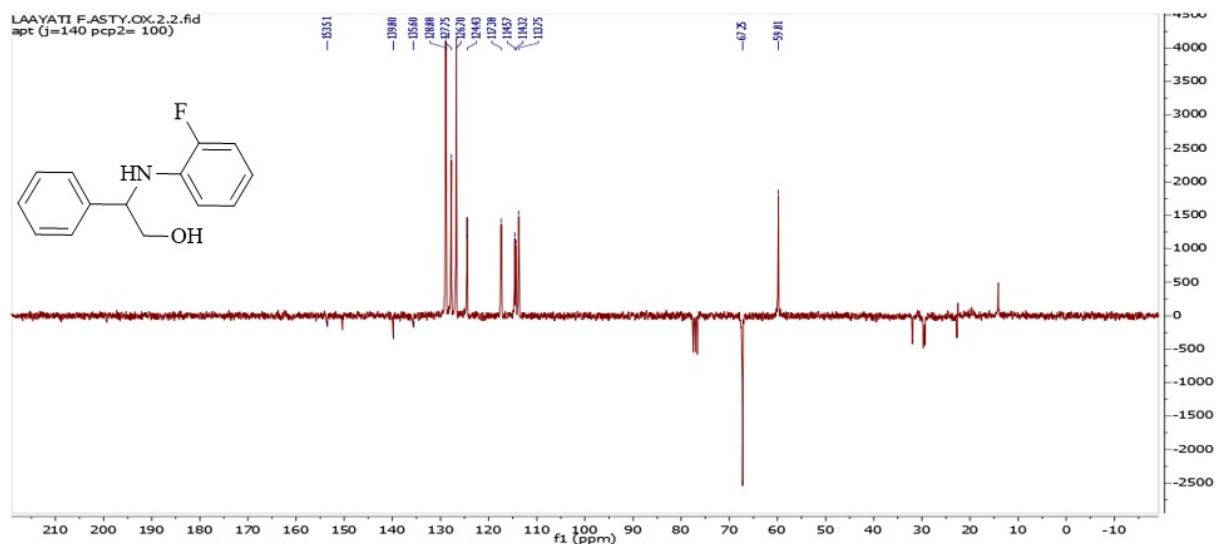

Figure S9: APT spectrum of 2-((2-fluorophenyl)amino)-2-phenylethanol

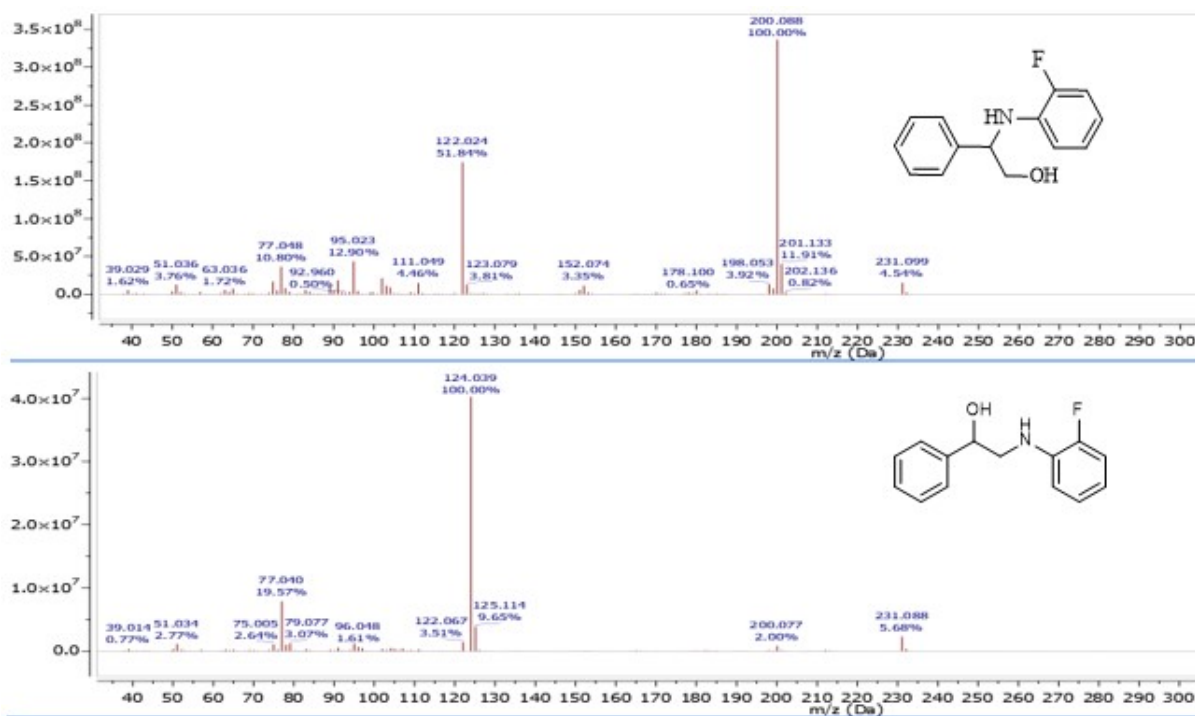

Figure S10: MS spectra of 2-((2-fluorophenyl)amino)-2-phenylethanol and 2-((2-fluorophenyl)amino)-1-phenylethanol



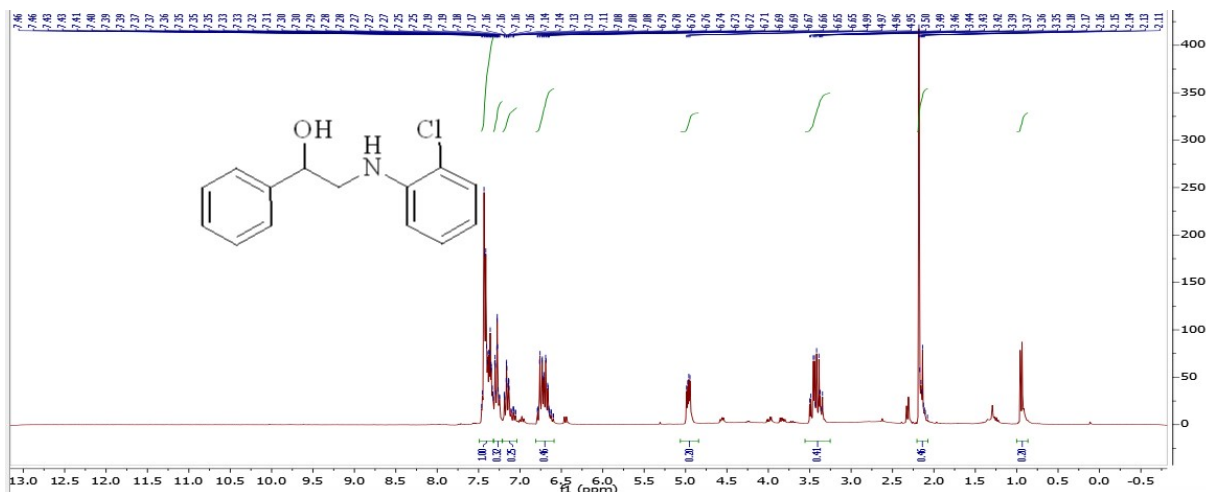

Figure S11:  $^1\text{H}$  NMR spectrum of 2-((2-chlorophenyl)amino)-1-phenylethanol

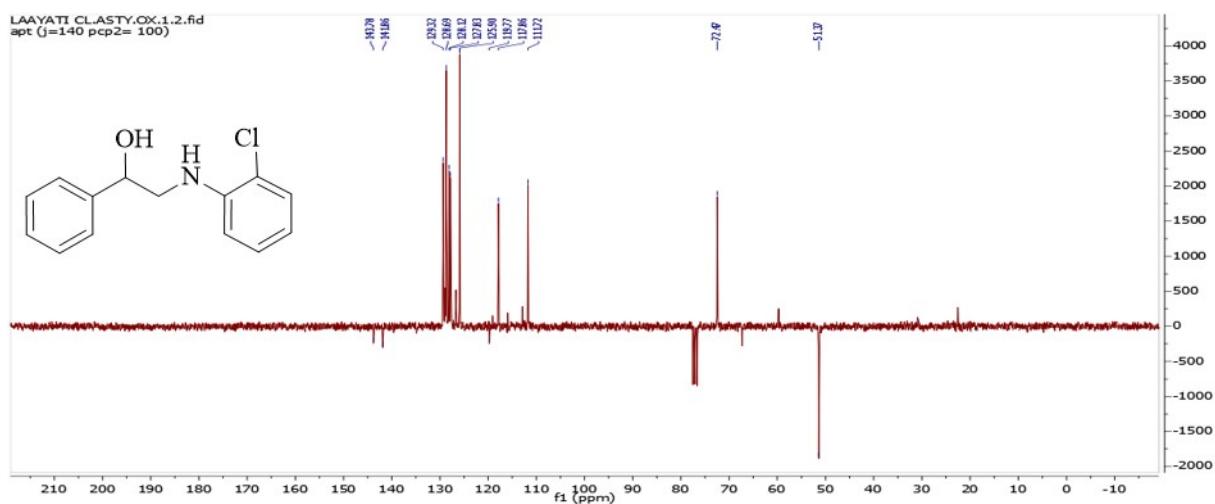

Figure S12: APT spectrum of 2-((2-chlorophenyl)amino)-1-phenylethanol

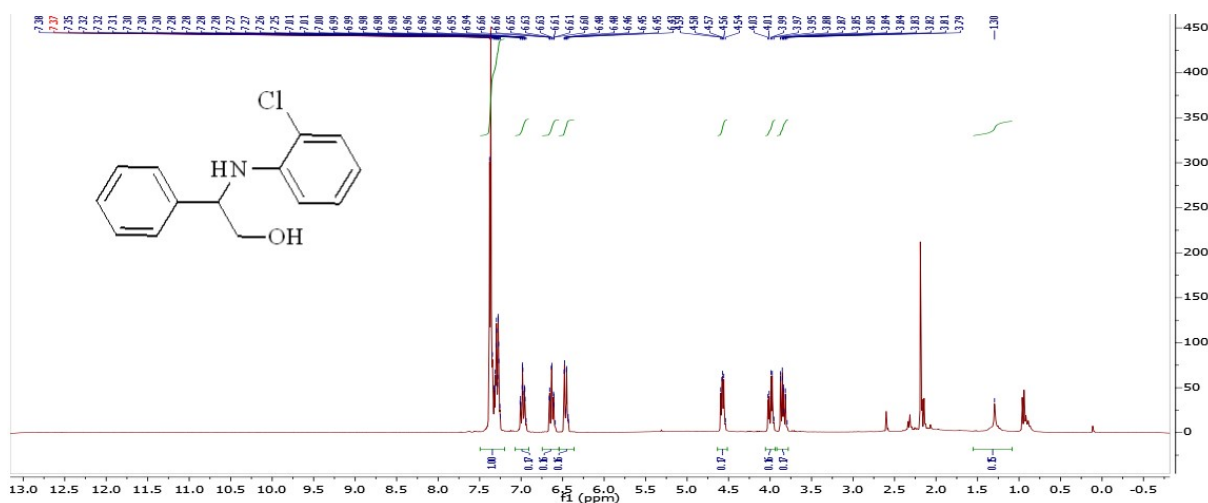

Figure S13:  $^1\text{H}$  NMR spectrum of 2-((2-chlorophenyl)amino)-2-phenylethanol

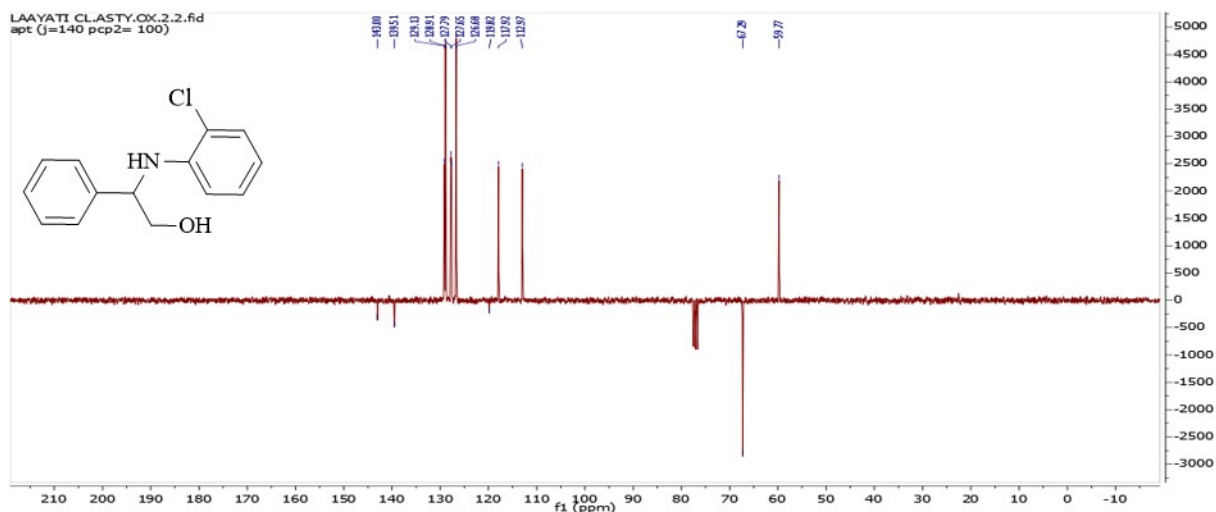

Figure S14: APT spectrum of 2-((2-chlorophenyl)amino)-2-phenylethanol

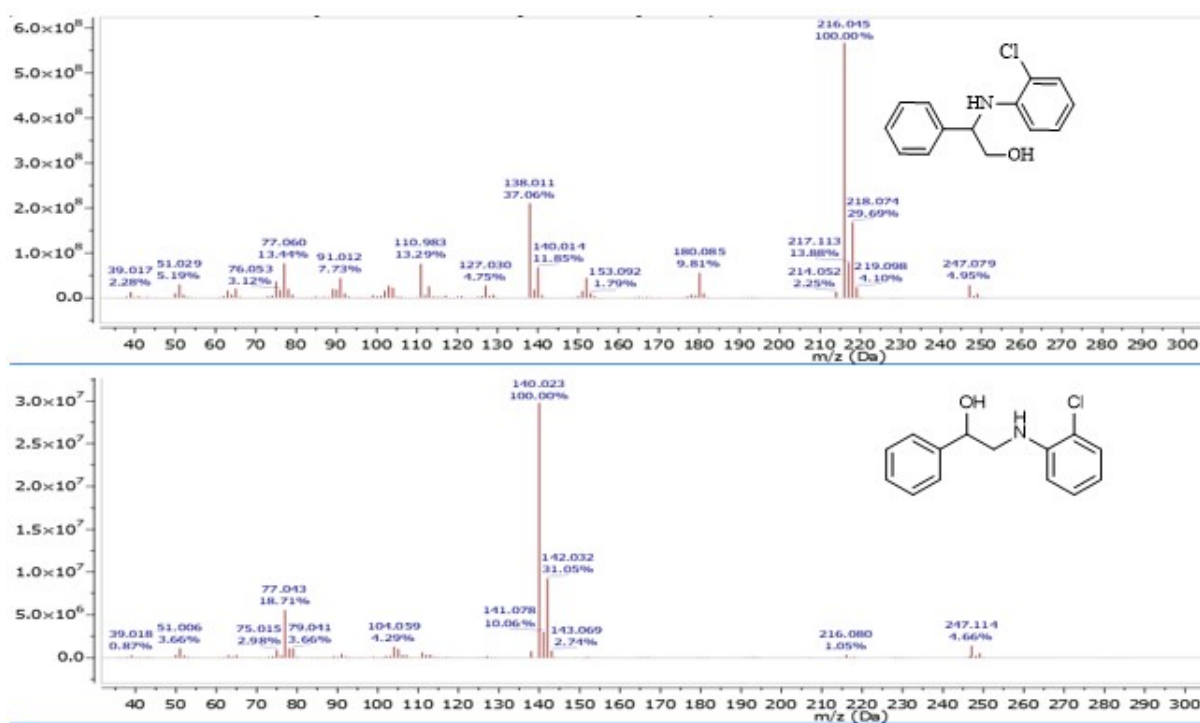

Figure S15: MS spectra of 2-((2-chlorophenyl)amino)-2-phenylethanol and 2-((2-chlorophenyl)amino)-1-phenylethanol

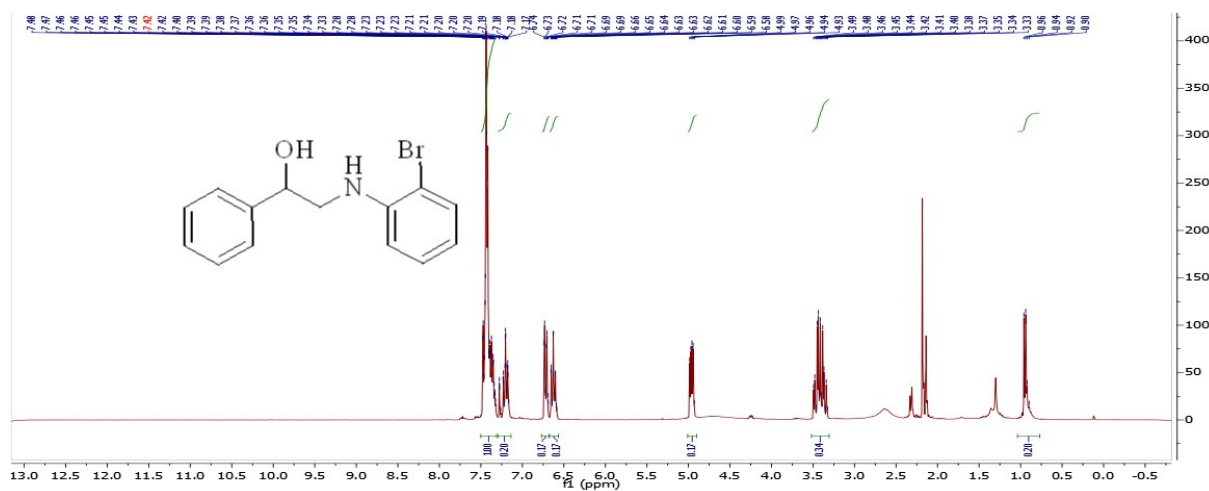

Figure S16:  $^1\text{H}$  NMR spectrum of 2-((2-bromophenyl)amino)-1-phenylethanol

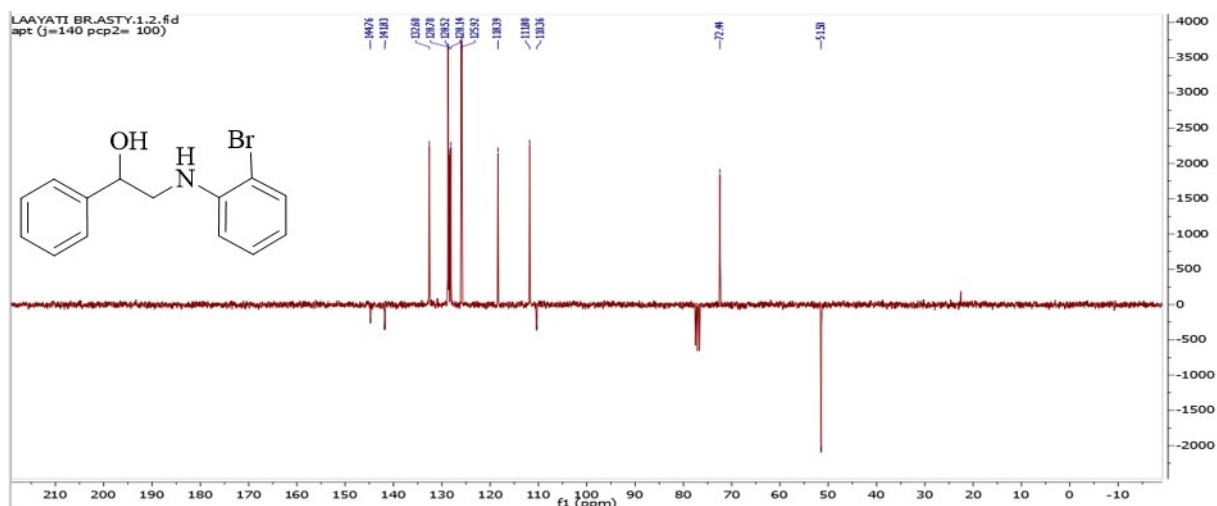

Figure 17: APT spectrum of 2-((2-bromophenyl)amino)-1-phenylethanol

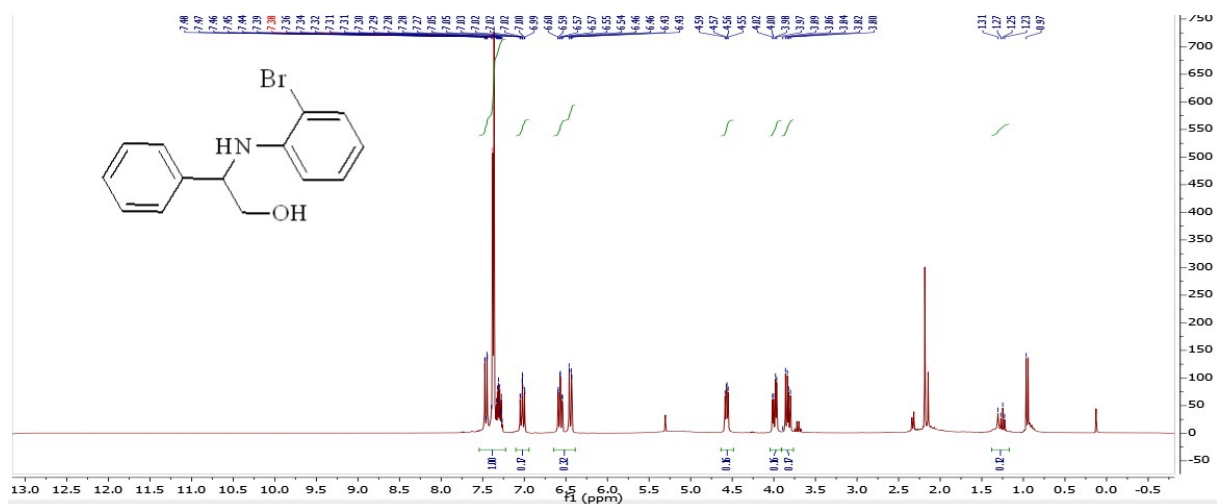

Figure S18:  $^1\text{H}$  NMR spectrum of 2-((2-bromophenyl)amino)-2-phenylethanol

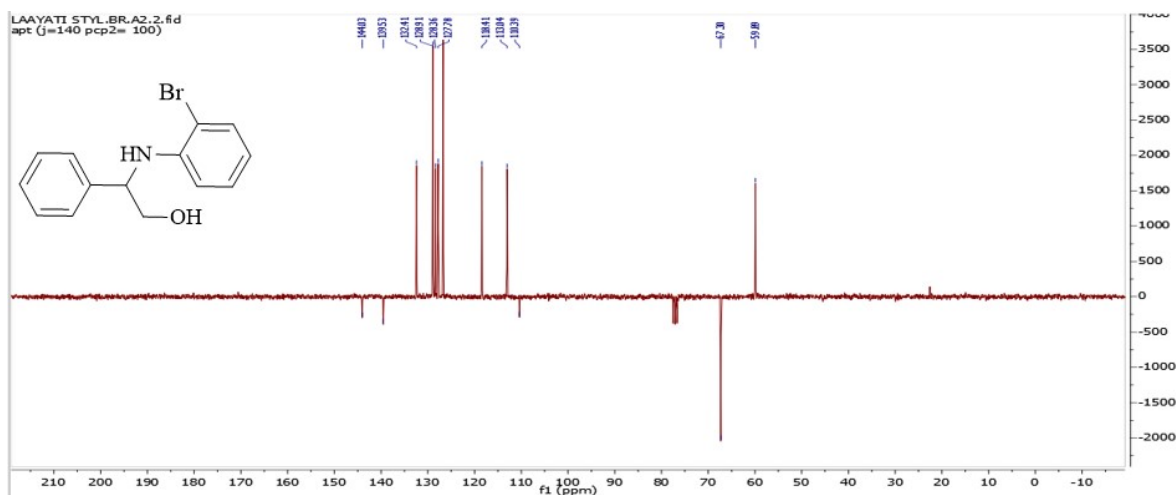

Figure S19: APT spectrum of 2-((2-bromophenyl)amino)-2-phenylethanol

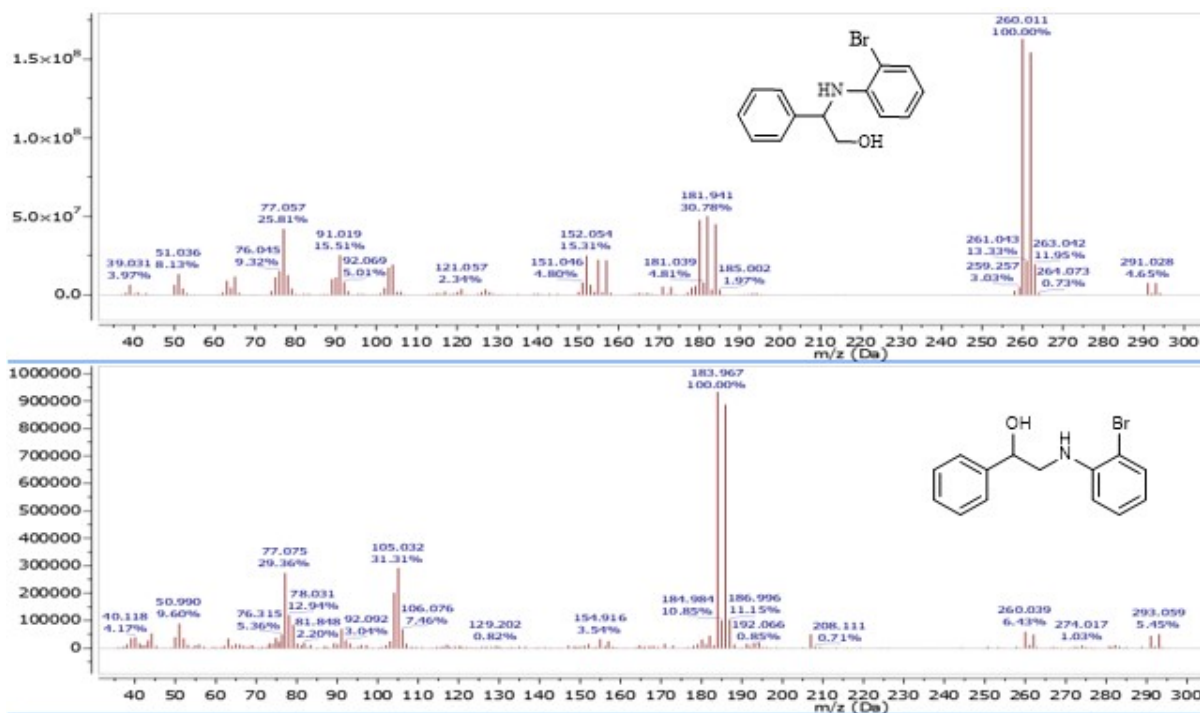

Figure S20: MS spectra of 2-((2-bromophenyl)amino)-2-phenylethanol and 2-((2-bromophenyl)amino)-1-phenylethanol

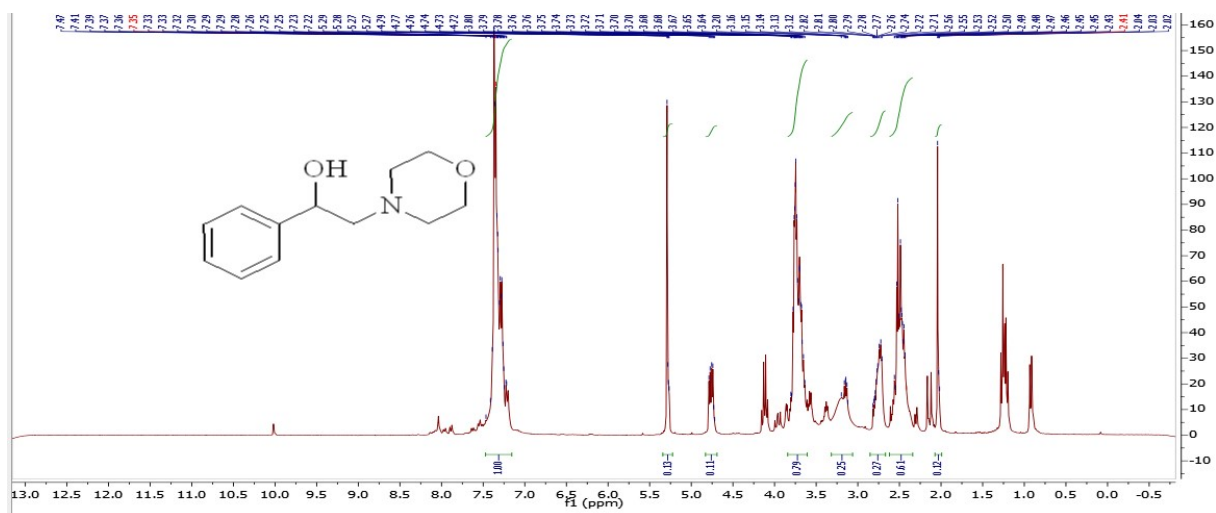

Figure S21:  $^1\text{H}$  NMR spectrum of 2-(morpholin-4-yl)-1-phenylethanol

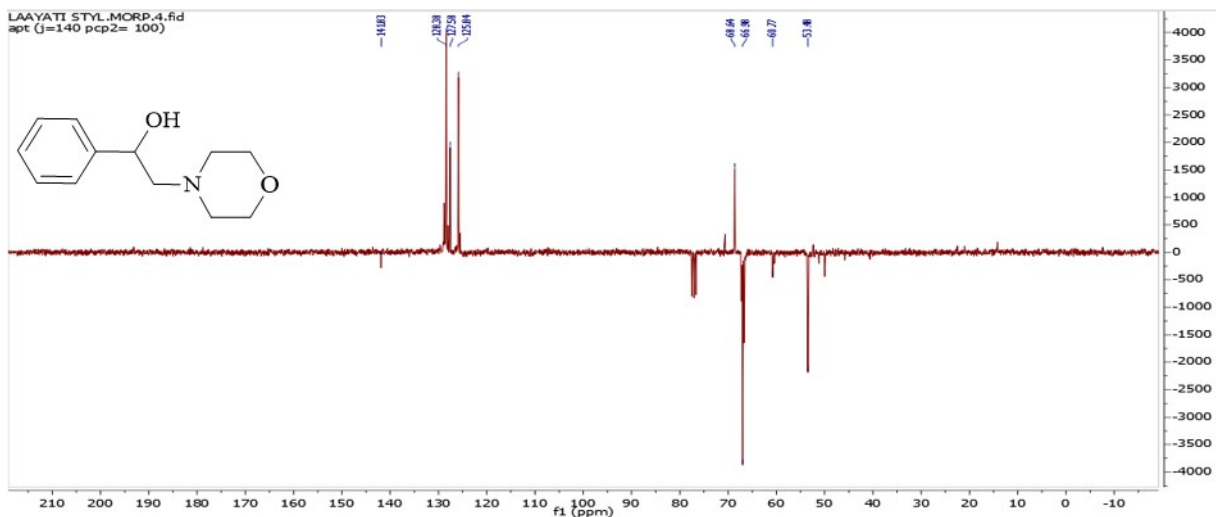

Figure S22: APT spectrum of 2-(morpholin-4-yl)-1-phenylethanol

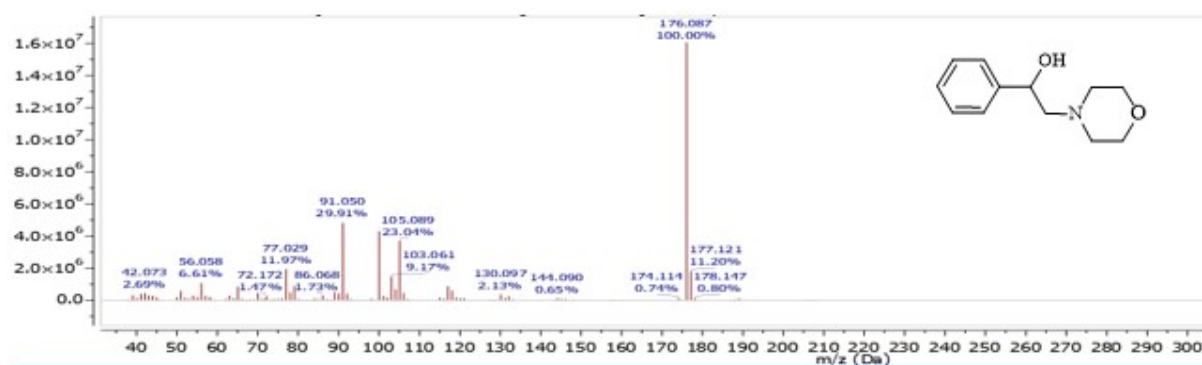

Figure S23: MS spectrum of 2-(morpholin-4-yl)-1-phenylethanol

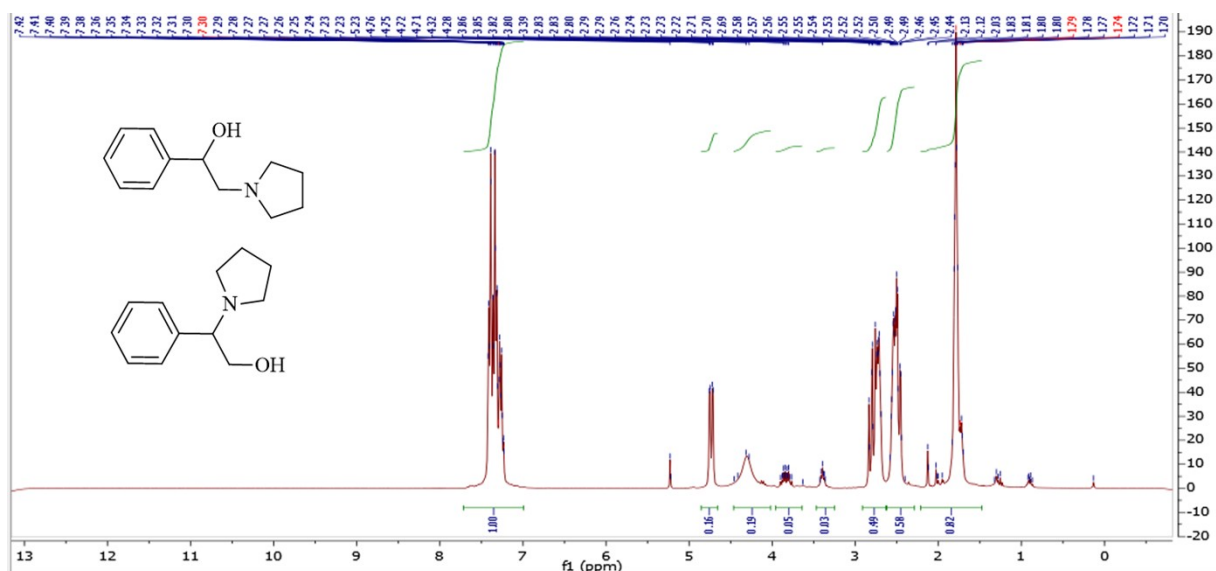

Figure S24:  $^1\text{H}$  NMR spectrum of 1-phenyl-2-(pyrrolidin-1-yl)ethanol and 2-phenyl-2-(pyrrolidin-1-yl)ethanol mixture

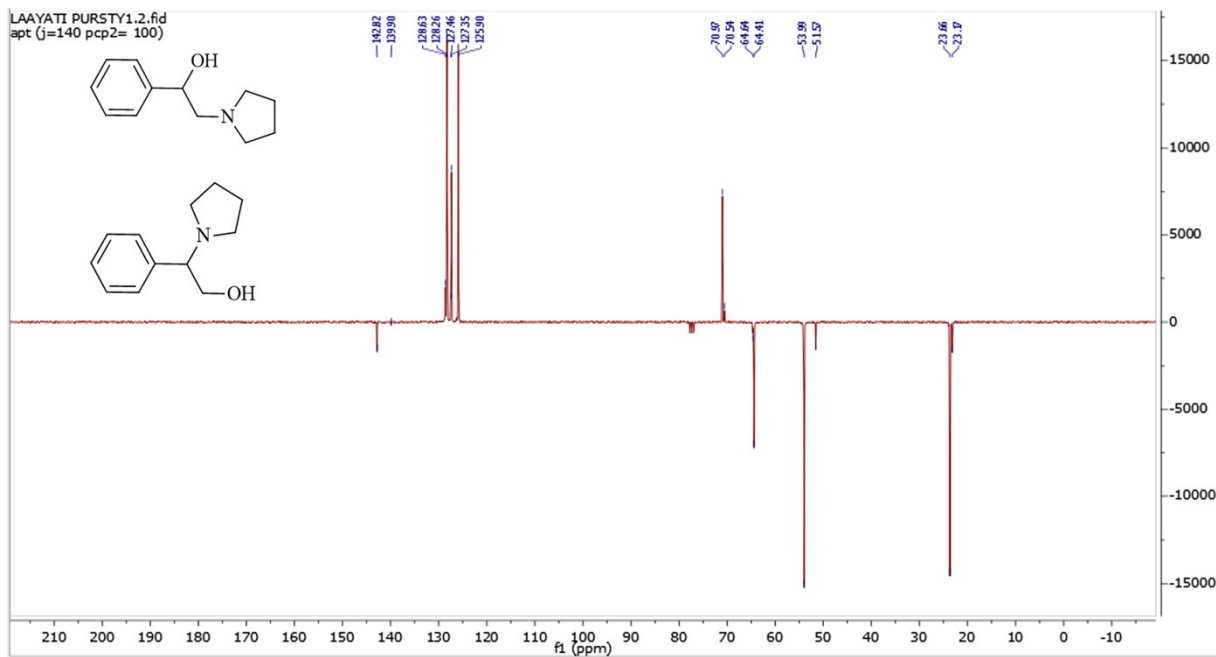

Figure S25: APT spectrum of 1-phenyl-2-(pyrrolidin-1-yl)ethanol and 2-phenyl-2-(pyrrolidin-1-yl)ethanol mixture

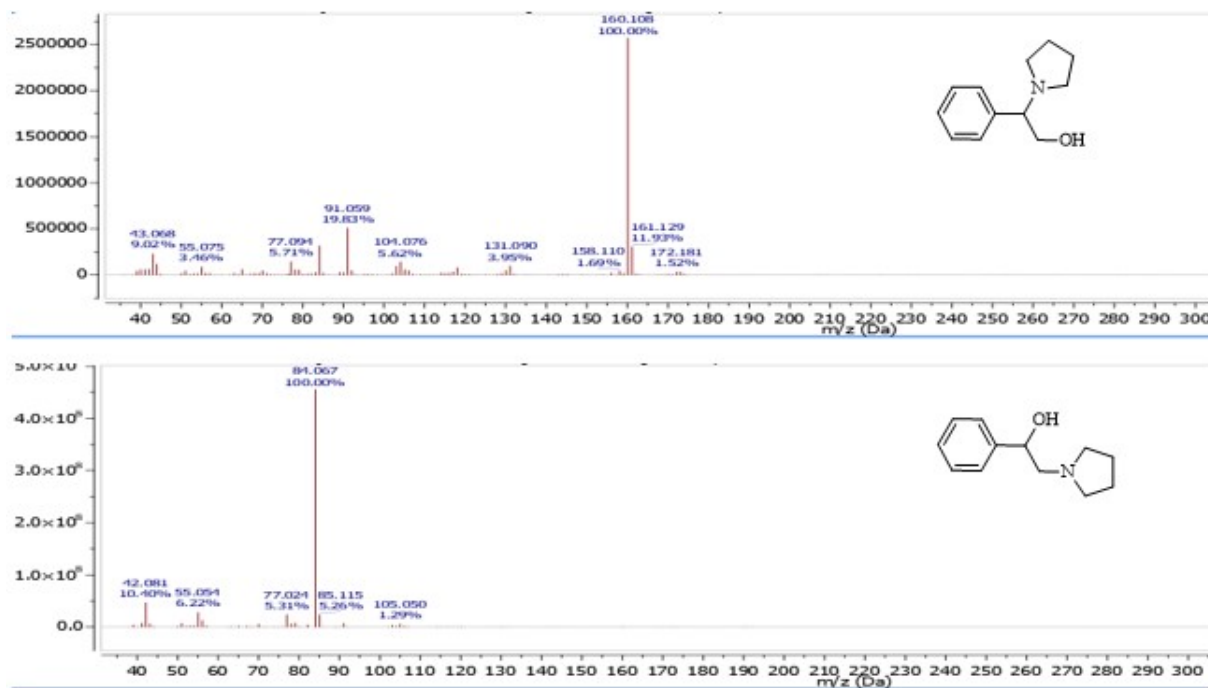

Figure S26: MS spectra of 1-phenyl-2-(pyrrolidin-1-yl)ethanol and 2-phenyl-2-(pyrrolidin-1-yl)ethanol

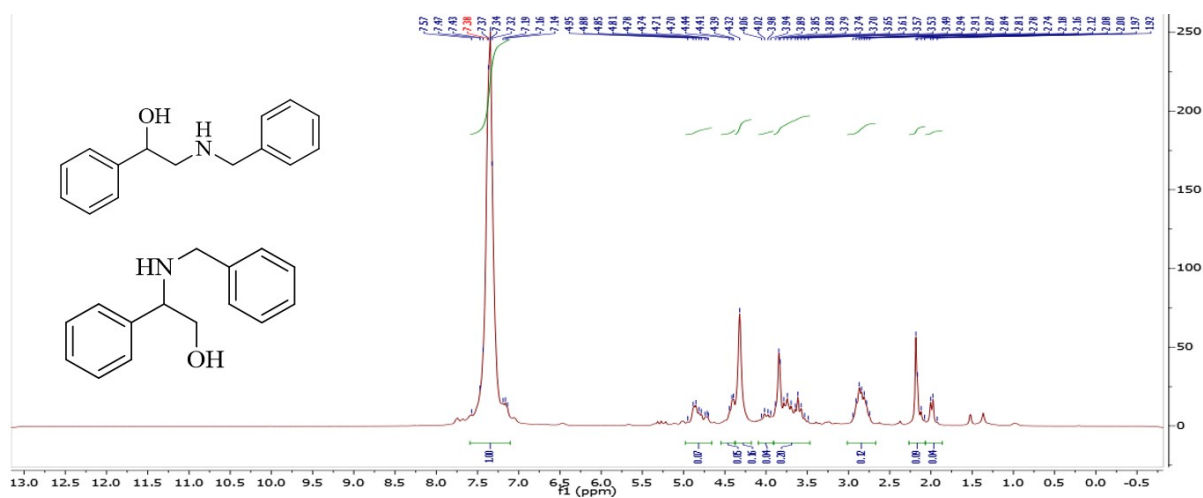

Figure S27: <sup>1</sup>H NMR spectrum of 2-(benzylamino)-1-phenylethanol and 2-(benzylamino)-2-phenylethanol mixture

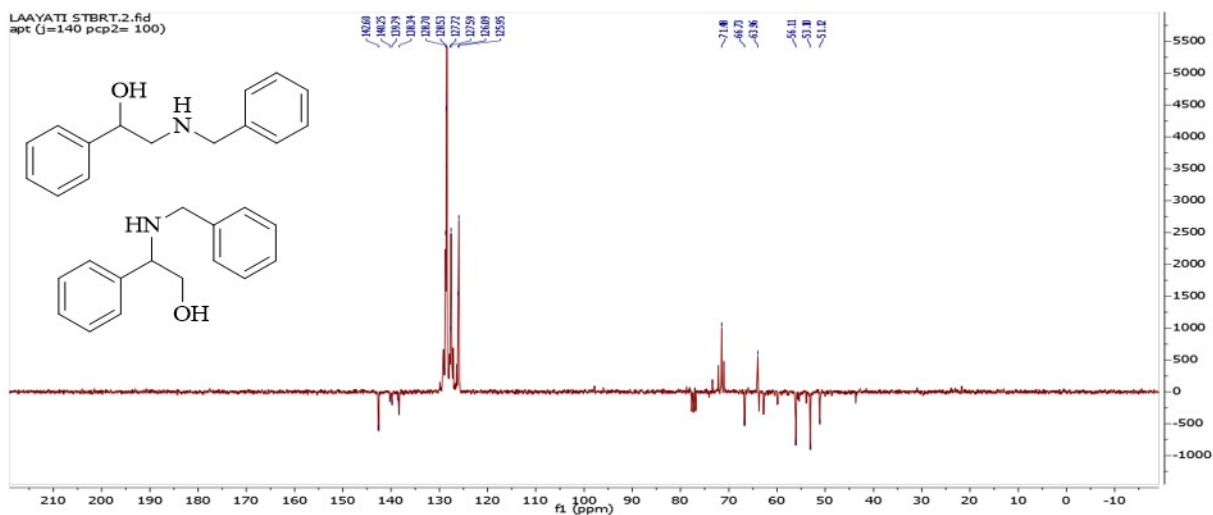

Figure S28: APT spectrum of 2-(benzylamino)-1-phenylethanol and 2-(benzylamino)-2-phenylethanol mixture

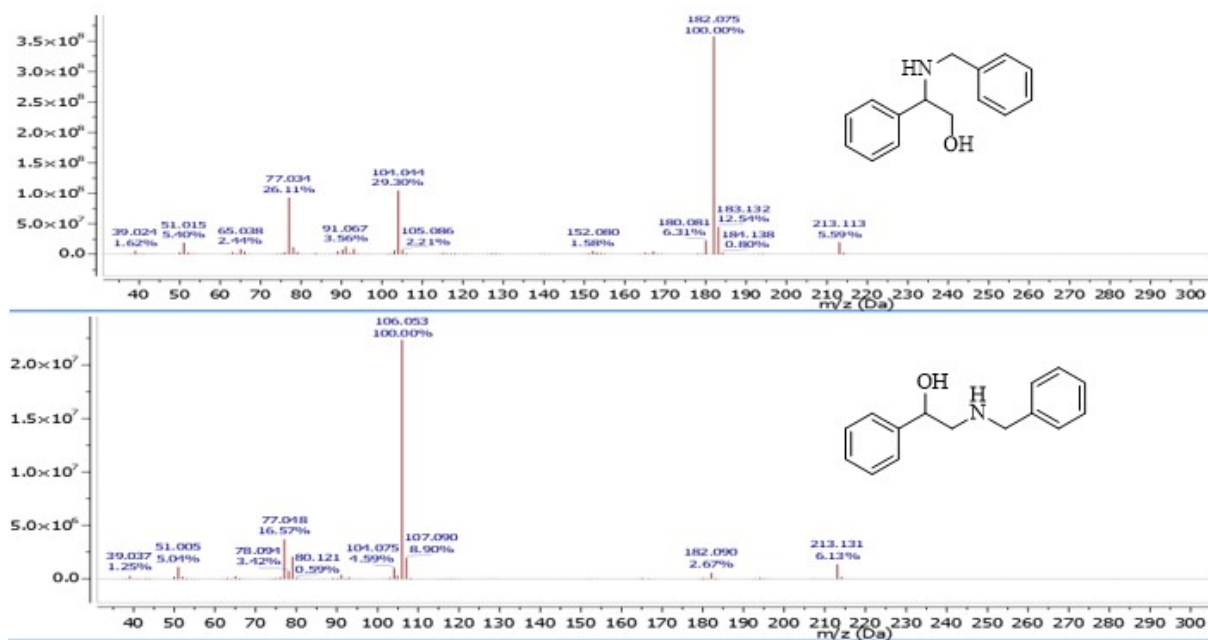

Figure S29: MS spectra of 2-(benzylamino)-2-phenylethanol and 2-(benzylamino)-1-phenylethanol



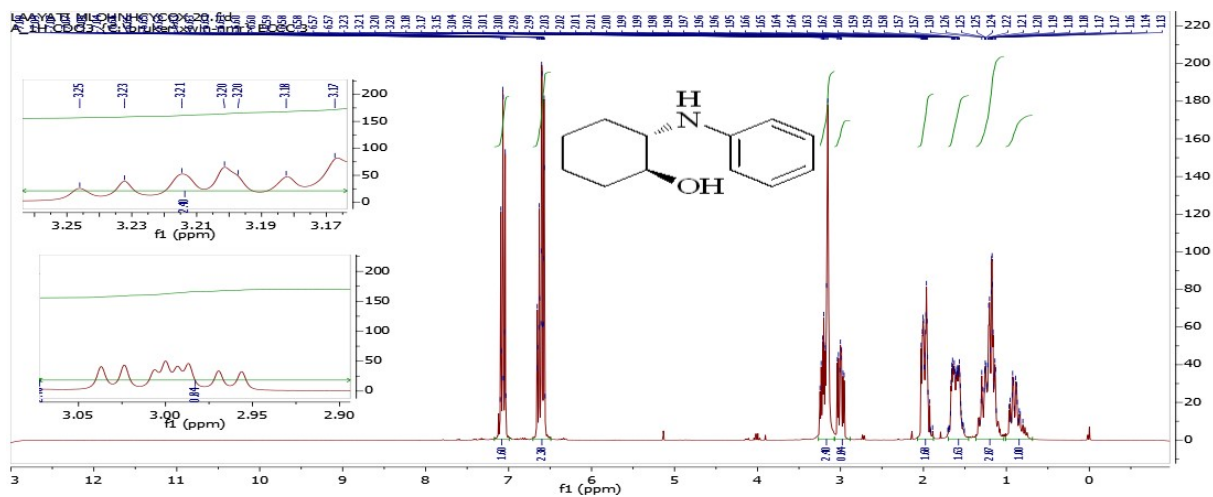

Figure S30:  $^1\text{H}$  NMR spectrum of 2-(phenylamino)-cyclohexanol

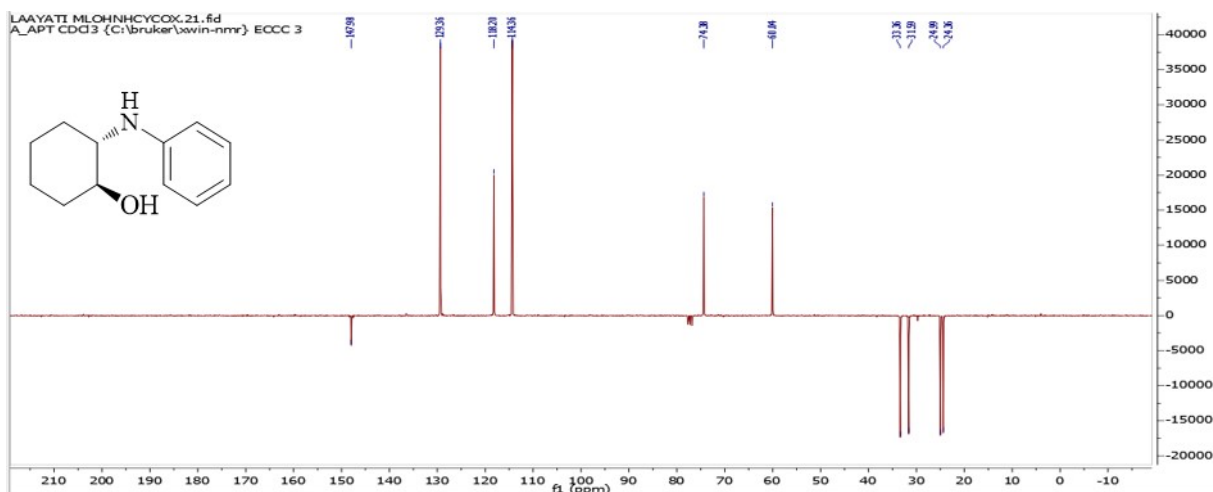

Figure S31: APT spectrum of 2-(phenylamino)-cyclohexanol

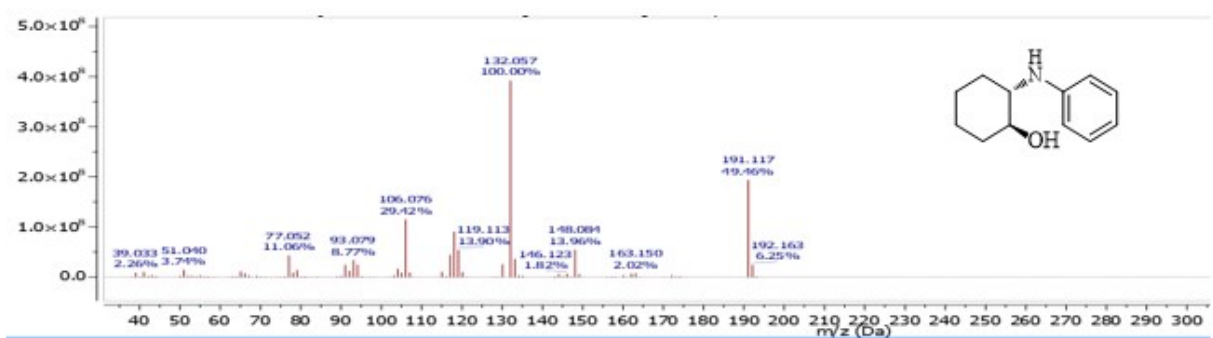

Figure S32: MS spectrum of 2-(phenylamino)-cyclohexanol

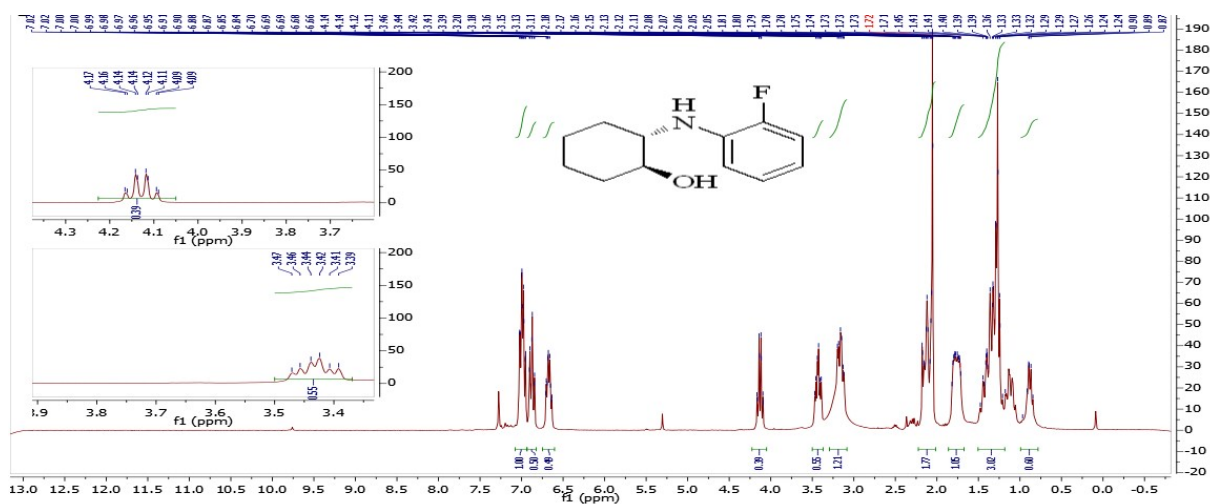

Figure S33:  $^1\text{H}$  NMR spectrum of 2-(2-fluorobenzylamino)cyclohexanol

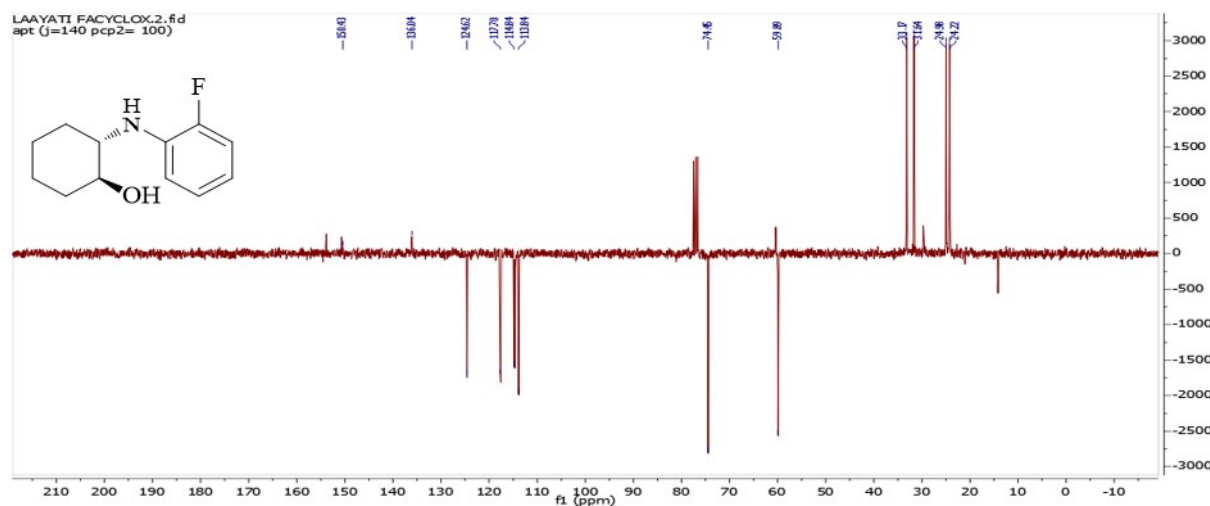

Figure S34: APT spectrum of 2-(2-fluorobenzylamino)cyclohexanol

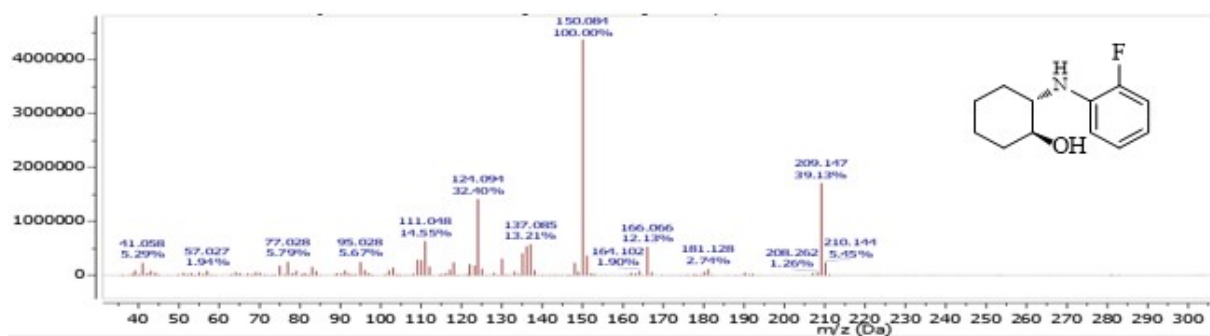

Figure S35: MS spectrum of 2-(2-fluorobenzylamino)cyclohexanol

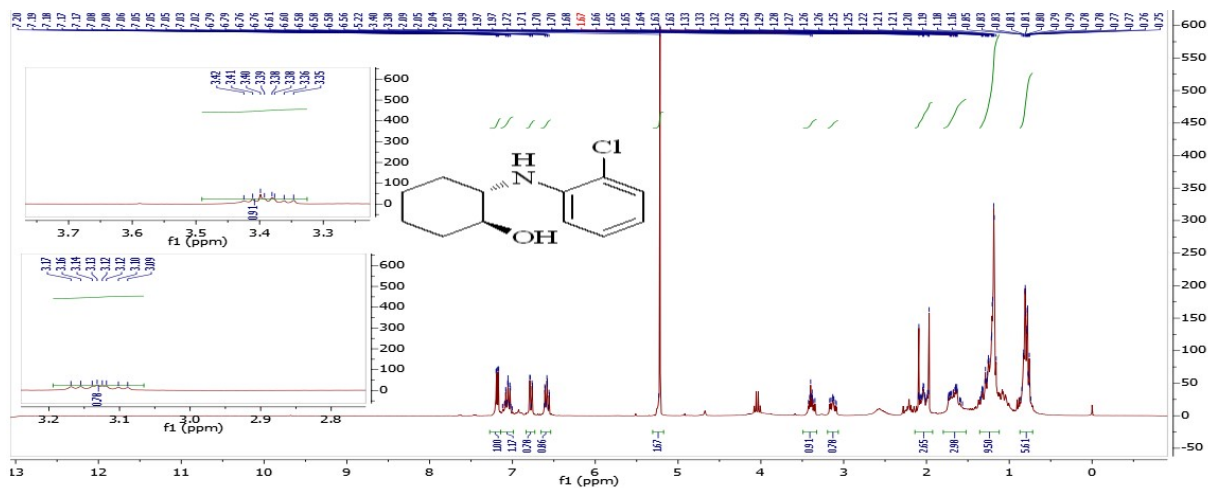

Figure S36:  $^1\text{H}$  NMR spectrum of 2-((2-chlorophenyl)amino)cyclohexanol

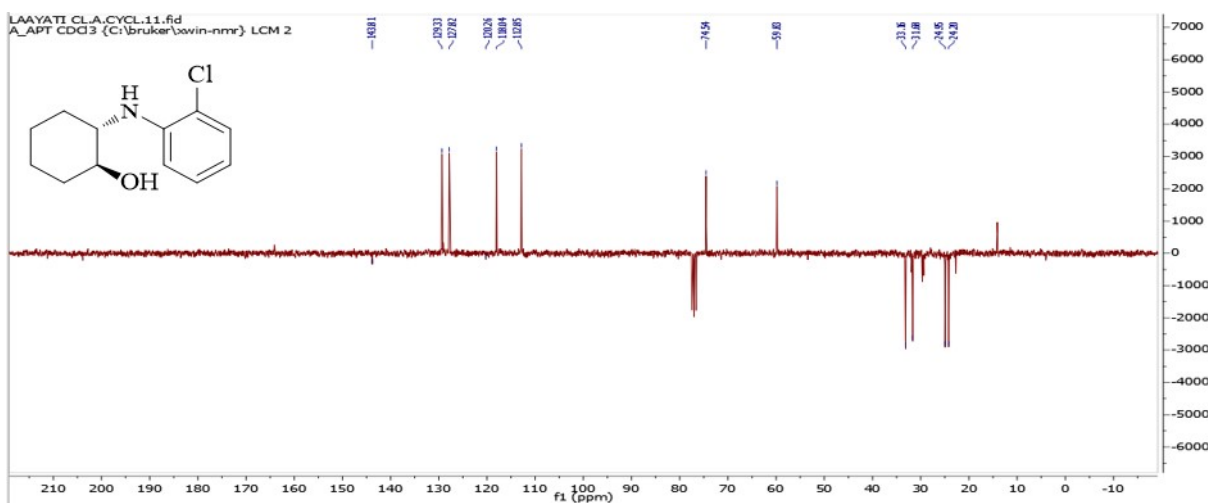

Figure S37: APT spectrum of 2-((2-chlorophenyl)amino)cyclohexanol

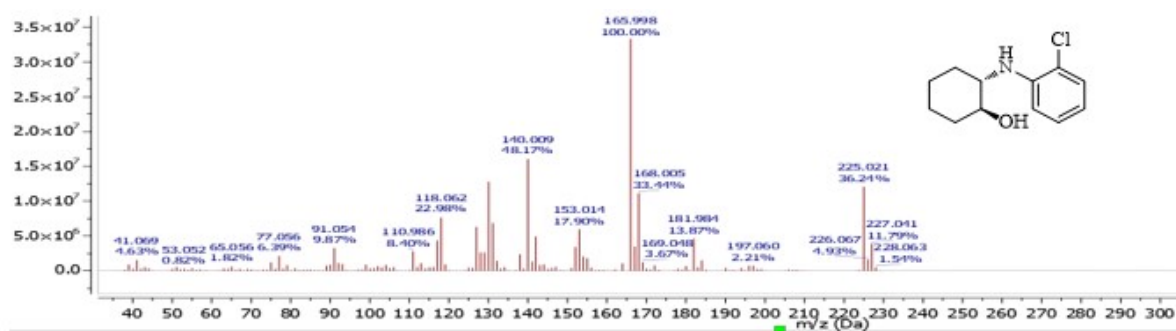

Figure S38: MS spectrum of 2-((2-chlorophenyl)amino)cyclohexanol

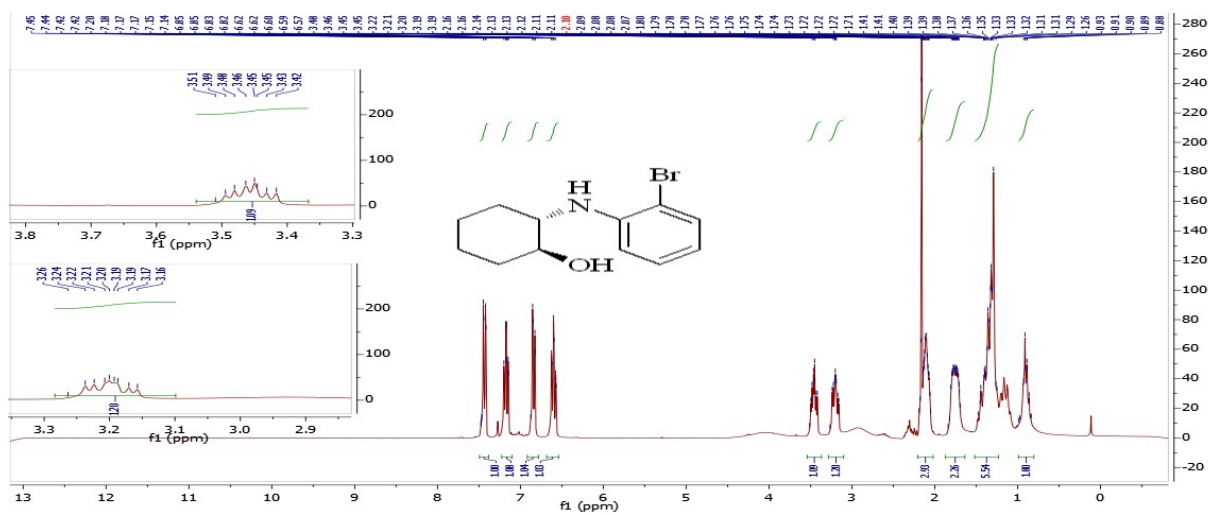

Figure S39:  $^1\text{H}$  NMR spectrum of 2-((2-bromophenyl)amino)cyclohexanol

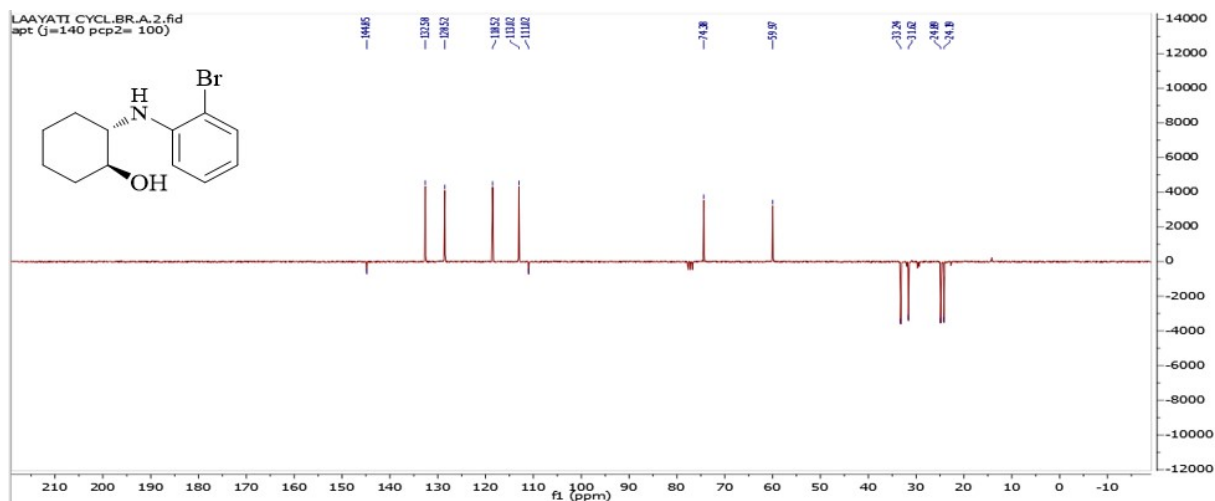

Figure S40: APT spectrum of 2-((2-bromophenyl)amino)cyclohexanol

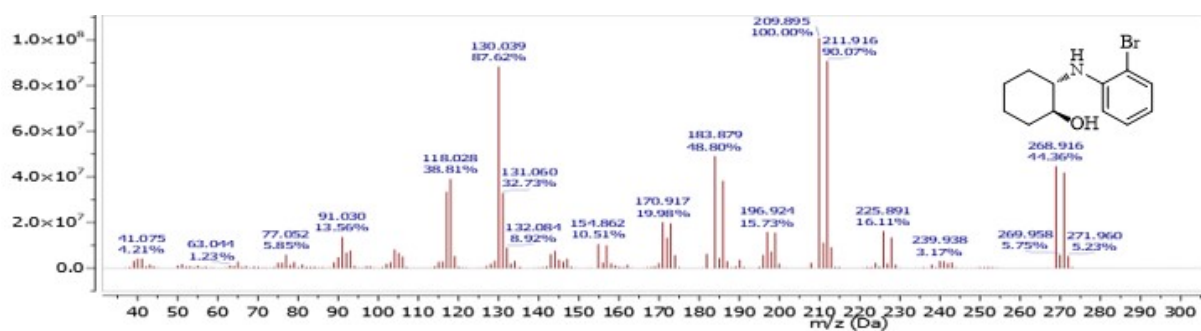

Figure S41: MS spectrum of 2-((2-bromophenyl)amino)cyclohexanol

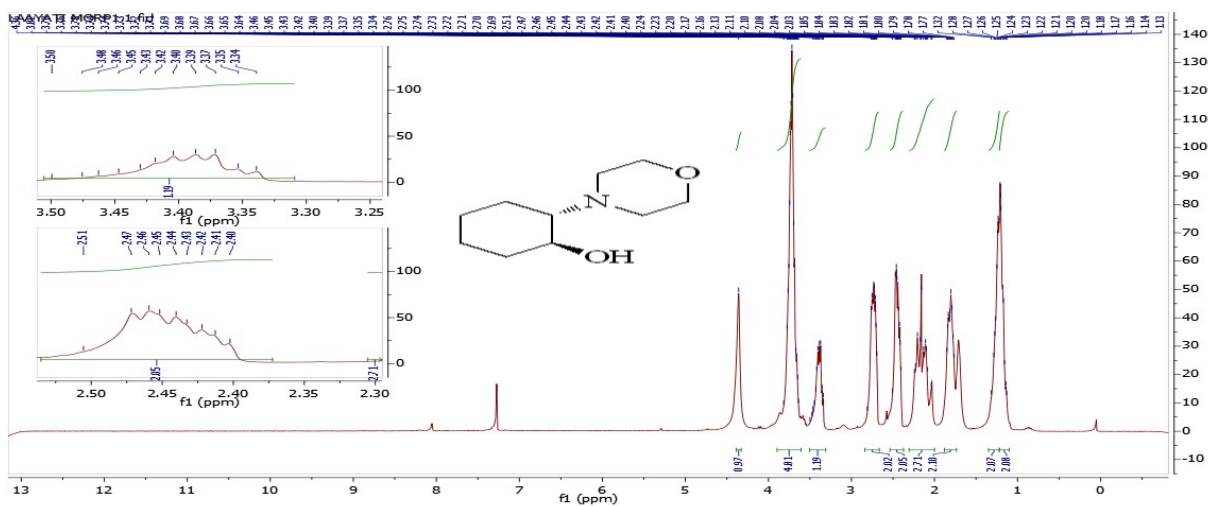

Figure S42:  $^1\text{H}$  NMR spectrum of 2-(morpholin-4-yl)cyclohexanol

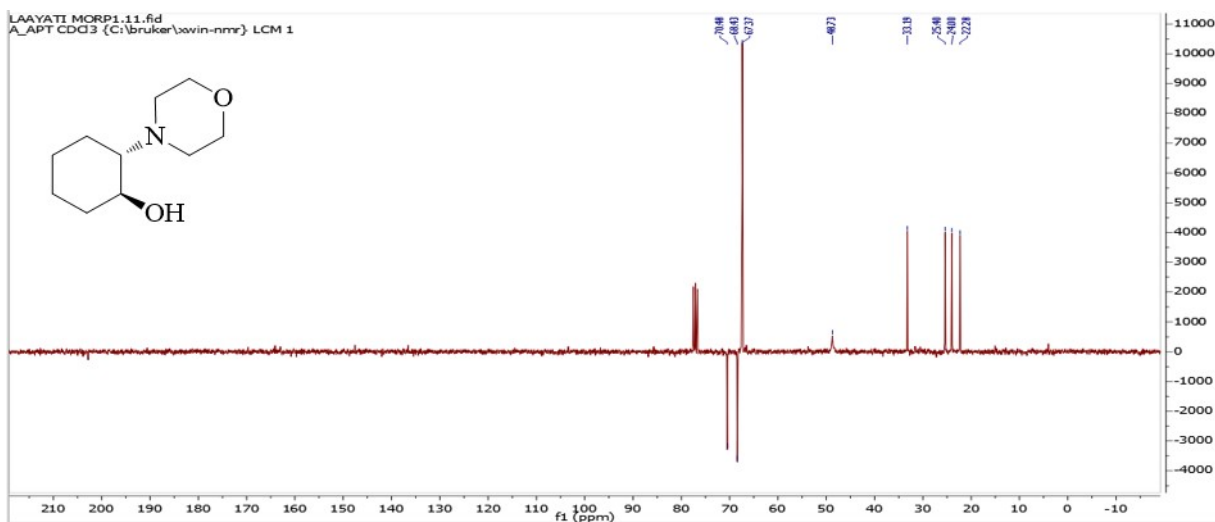

Figure S43: APT spectrum of 2-(morpholin-4-yl)cyclohexanol

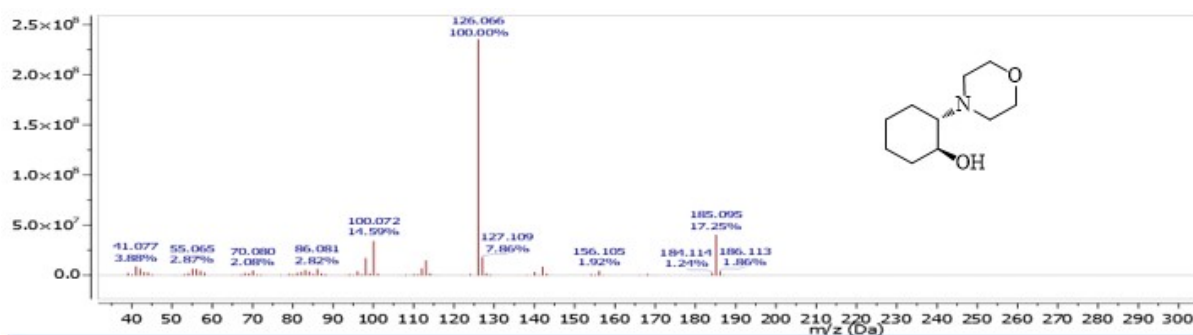

Figure S44: MS spectrum of 2-(morpholin-4-yl)cyclohexanol

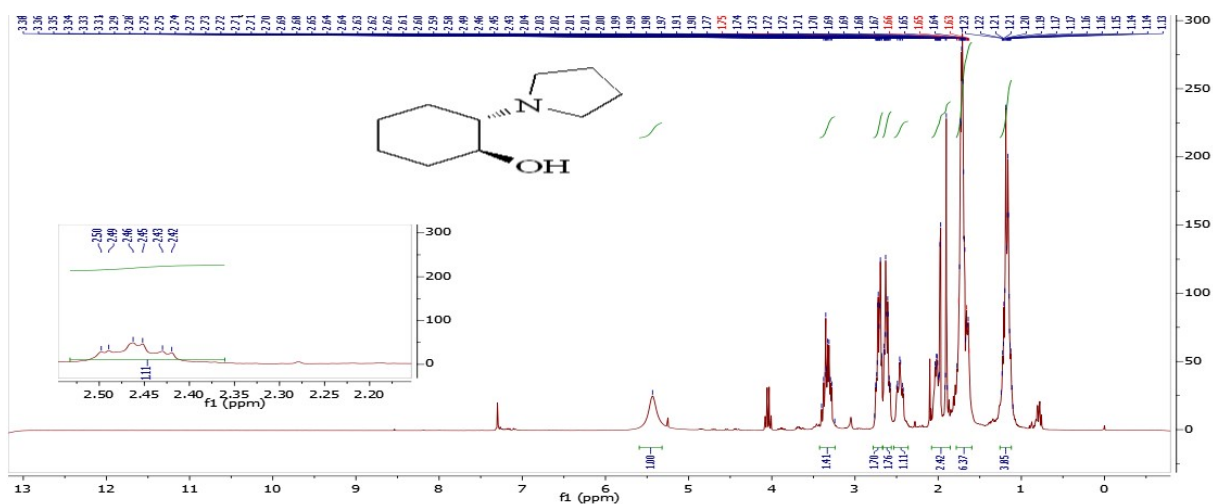

Figure S45: <sup>1</sup>H NMR spectrum of 2-(pyrrolidin-1-yl)cyclohexanol

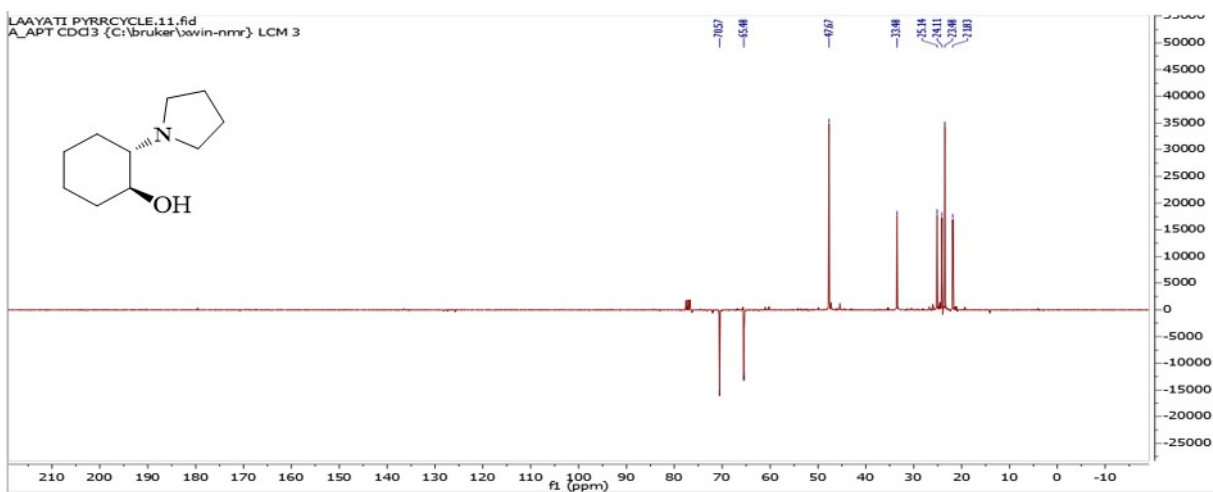

Figure S46: APT spectrum of 2-(pyrrolidin-1-yl)cyclohexanol

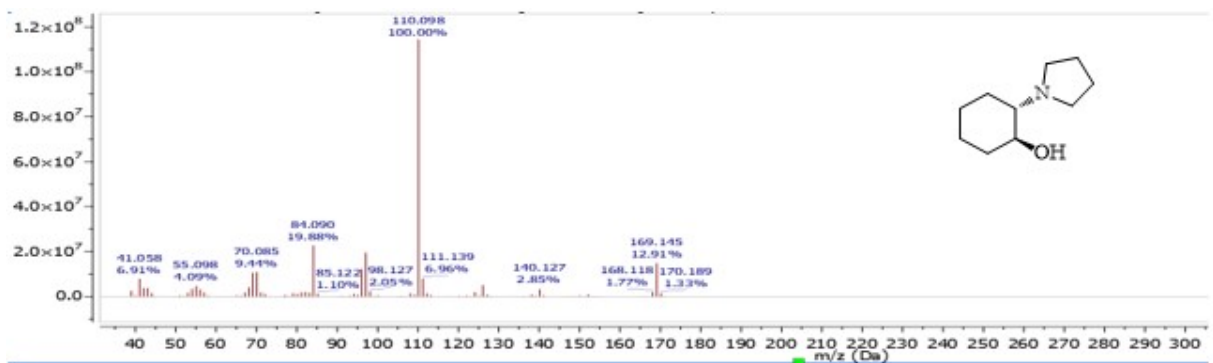

Figure S47: MS spectrum of 2-(pyrrolidin-1-yl)cyclohexanol

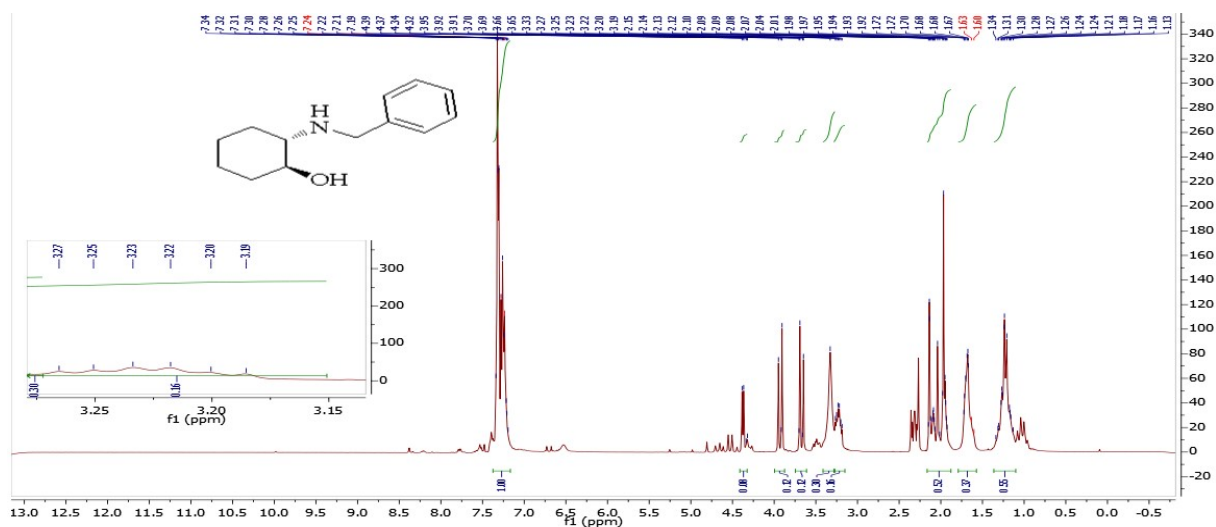

Figure S48:  $^1\text{H}$  NMR spectrum of 2-(benzylamino)cyclohexanol

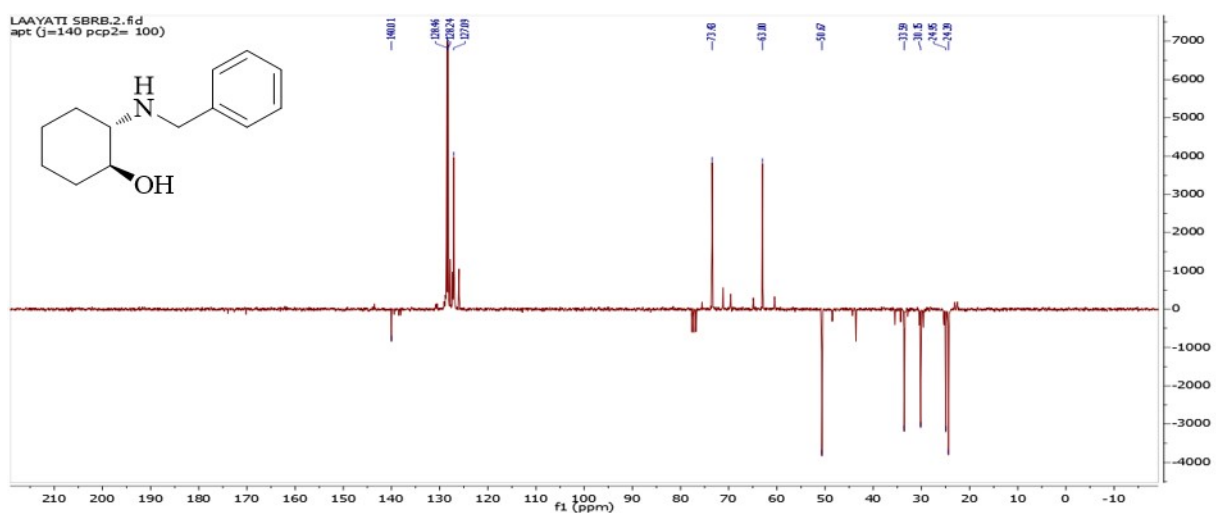

Figure S49: APT spectrum of 2-(benzylamino)cyclohexanol

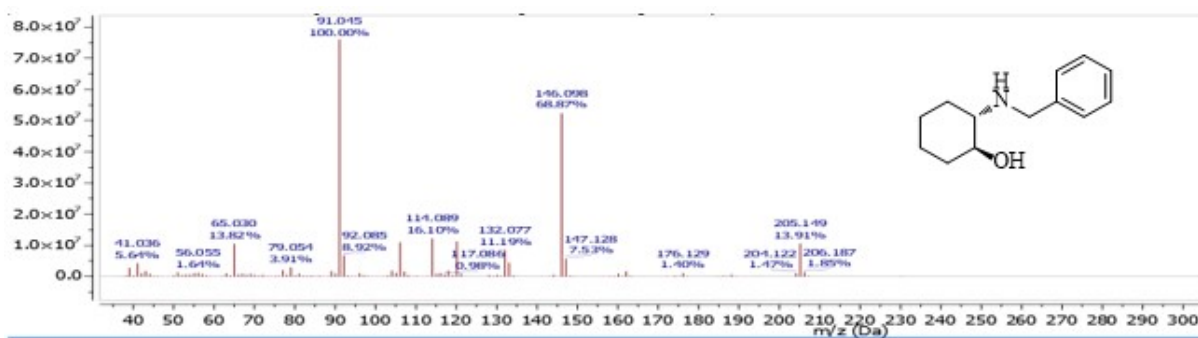

Figure S50: MS spectrum of 2-(benzylamino)cyclohexanol

## B- Cartesian coordinates and energy for all optimized geometries

### 2-Phenyloxirane (2POX)

Energy: -384.490968 (Hartrees)

| Center<br>Number | Atomic<br>Number | Atomic<br>Type | Coordinates (Angstroms) |           |           |
|------------------|------------------|----------------|-------------------------|-----------|-----------|
|                  |                  |                | X                       | Y         | Z         |
| 1                | 6                | 0              | 1.663876                | -1.339696 | 0.030899  |
| 2                | 6                | 0              | 0.302212                | -1.062140 | -0.079497 |
| 3                | 6                | 0              | -0.146644               | 0.263707  | -0.118171 |
| 4                | 6                | 0              | 0.788040                | 1.304154  | -0.059286 |
| 5                | 6                | 0              | 2.149940                | 1.025400  | 0.055298  |
| 6                | 6                | 0              | 2.591399                | -0.297902 | 0.102478  |
| 7                | 1                | 0              | 2.002918                | -2.371458 | 0.054507  |
| 8                | 1                | 0              | -0.424922               | -1.864012 | -0.158607 |
| 9                | 1                | 0              | 0.447872                | 2.336109  | -0.102958 |
| 10               | 1                | 0              | 2.865732                | 1.841048  | 0.101616  |
| 11               | 1                | 0              | 3.651971                | -0.516015 | 0.186683  |
| 12               | 6                | 0              | -1.602630               | 0.577939  | -0.208060 |
| 13               | 6                | 0              | -2.588668               | 0.023857  | 0.743384  |
| 14               | 8                | 0              | -2.488584               | -0.484026 | -0.589610 |
| 15               | 1                | 0              | -2.240429               | -0.646962 | 1.528386  |
| 16               | 1                | 0              | -3.499053               | 0.580182  | 0.967898  |
| 17               | 1                | 0              | -1.840572               | 1.541393  | -0.662910 |

### Aniline

Energy: -287.3264359 (Hartrees)

| Center<br>Number | Atomic<br>Number | Atomic<br>Type | Coordinates (Angstroms) |          |          |
|------------------|------------------|----------------|-------------------------|----------|----------|
|                  |                  |                | X                       | Y        | Z        |
| 1                | 6                | 0              | 0.242216                | 1.192298 | 0.000006 |



|    |   |   |           |           |           |
|----|---|---|-----------|-----------|-----------|
| 2  | 6 | 0 | -1.152420 | 1.223195  | 0.000035  |
| 3  | 6 | 0 | -1.879208 | 0.030692  | 0.000023  |
| 4  | 6 | 0 | -1.203045 | -1.189852 | 0.000003  |
| 5  | 6 | 0 | 0.192917  | -1.218961 | -0.000060 |
| 6  | 6 | 0 | 0.928211  | -0.030163 | -0.000060 |
| 7  | 1 | 0 | 0.808074  | 2.121146  | 0.000029  |
| 8  | 1 | 0 | -1.671481 | 2.177634  | 0.000061  |
| 9  | 1 | 0 | -2.965046 | 0.054142  | 0.000038  |
| 10 | 1 | 0 | -1.761928 | -2.121396 | -0.000014 |
| 11 | 1 | 0 | 0.736178  | -2.158400 | -0.000140 |
| 12 | 7 | 0 | 2.369497  | -0.120344 | -0.000107 |
| 13 | 1 | 0 | 2.747868  | 0.364092  | -0.811730 |
| 14 | 1 | 0 | 2.747825  | 0.361945  | 0.812818  |

---

### Morpholine

Energy: -287.5372479 (Hartrees)

---

| Center<br>Number | Atomic<br>Number | Atomic<br>Type | Coordinates (Angstroms) |           |           |
|------------------|------------------|----------------|-------------------------|-----------|-----------|
|                  |                  |                | X                       | Y         | Z         |
| 1                | 6                | 0              | 0.012900                | -0.776102 | 1.177809  |
| 2                | 6                | 0              | 0.012900                | 0.754891  | 1.207644  |
| 3                | 6                | 0              | 0.012900                | 0.754891  | -1.207644 |
| 4                | 6                | 0              | 0.012900                | -0.776102 | -1.177809 |
| 5                | 1                | 0              | -0.526617               | 1.122240  | 2.088302  |
| 6                | 1                | 0              | -1.025974               | -1.150217 | 1.229193  |
| 7                | 1                | 0              | 0.567532                | -1.195582 | 2.023707  |
| 8                | 1                | 0              | -0.526617               | 1.122240  | -2.088302 |
| 9                | 1                | 0              | 1.049213                | 1.108081  | -1.284363 |
| 10               | 1                | 0              | -1.025974               | -1.150217 | -1.229193 |
| 11               | 1                | 0              | 0.567532                | -1.195582 | -2.023707 |
| 12               | 1                | 0              | 1.049213                | 1.108081  | 1.284363  |
| 13               | 7                | 0              | -0.576552               | 1.347881  | 0.000000  |
| 14               | 1                | 0              | -1.579351               | 1.163009  | 0.000000  |

15            8            0      0.647163 -1.264087 0.000000

---

## 2POX-Fe

Energy: -508.1207002 (Hartrees)

---

| Center<br>Number | Atomic<br>Number | Atomic<br>Type | Coordinates (Angstroms) |           |           |
|------------------|------------------|----------------|-------------------------|-----------|-----------|
|                  |                  |                | X                       | Y         | Z         |
| 1                | 6                | 0              | 2.553512                | -1.374209 | 0.637547  |
| 2                | 6                | 0              | 1.313384                | -0.740621 | 0.683825  |
| 3                | 6                | 0              | 1.110747                | 0.458805  | -0.012542 |
| 4                | 6                | 0              | 2.159940                | 1.006879  | -0.760285 |
| 5                | 6                | 0              | 3.402977                | 0.374579  | -0.798370 |
| 6                | 6                | 0              | 3.602016                | -0.816607 | -0.099166 |
| 7                | 1                | 0              | 2.700249                | -2.308020 | 1.172058  |
| 8                | 1                | 0              | 0.491670                | -1.185879 | 1.236501  |
| 9                | 1                | 0              | 2.003862                | 1.929277  | -1.314134 |
| 10               | 1                | 0              | 4.210679                | 0.807821  | -1.380679 |
| 11               | 1                | 0              | 4.566836                | -1.313745 | -0.134385 |
| 12               | 6                | 0              | -0.189742               | 1.178872  | 0.038895  |
| 13               | 6                | 0              | -0.959353               | 1.372310  | 1.290146  |
| 14               | 8                | 0              | -1.384443               | 0.383911  | 0.324723  |
| 15               | 1                | 0              | -0.571789               | 0.951956  | 2.214882  |
| 16               | 1                | 0              | -1.633196               | 2.219291  | 1.391410  |
| 17               | 1                | 0              | -0.357096               | 1.902820  | -0.755889 |
| 18               | 26               | 0              | -3.011406               | -0.570571 | -0.419533 |

---

## 2POX-Sr

Energy: -415.2899312 (Hartrees)

---

| Center<br>Number | Atomic<br>Number | Atomic<br>Type | Coordinates (Angstroms) |   |   |
|------------------|------------------|----------------|-------------------------|---|---|
|                  |                  |                | X                       | Y | Z |

---

|    |    |   |           |           |           |
|----|----|---|-----------|-----------|-----------|
| 1  | 6  | 0 | 3.053406  | -1.418704 | 0.785014  |
| 2  | 6  | 0 | 1.890181  | -0.651070 | 0.757230  |
| 3  | 6  | 0 | 1.795271  | 0.453262  | -0.099689 |
| 4  | 6  | 0 | 2.874590  | 0.769645  | -0.933425 |
| 5  | 6  | 0 | 4.040110  | 0.003353  | -0.900652 |
| 6  | 6  | 0 | 4.132376  | -1.091976 | -0.040378 |
| 7  | 1  | 0 | 3.115833  | -2.277222 | 1.447438  |
| 8  | 1  | 0 | 1.040941  | -0.913172 | 1.380897  |
| 9  | 1  | 0 | 2.802614  | 1.617825  | -1.610072 |
| 10 | 1  | 0 | 4.871582  | 0.258005  | -1.551311 |
| 11 | 1  | 0 | 5.036760  | -1.692869 | -0.018375 |
| 12 | 6  | 0 | 0.575942  | 1.310554  | -0.125247 |
| 13 | 6  | 0 | -0.043543 | 1.849627  | 1.101422  |
| 14 | 8  | 0 | -0.649767 | 0.744262  | 0.402134  |
| 15 | 1  | 0 | 0.392959  | 1.595363  | 2.065422  |
| 16 | 1  | 0 | -0.603739 | 2.782860  | 1.063509  |
| 17 | 1  | 0 | 0.429198  | 1.881878  | -1.042180 |
| 18 | 38 | 0 | -3.205211 | -0.435655 | -0.216264 |

-----

## 2POX-AcOOH

Energy: -805.7124119 (Hartrees)

-----

| Center<br>Number | Atomic<br>Number | Atomic<br>Type | Coordinates (Angstroms) |           |           |
|------------------|------------------|----------------|-------------------------|-----------|-----------|
|                  |                  |                | X                       | Y         | Z         |
| 1                | 6                | 0              | 5.438595                | -0.820722 | -0.517560 |
| 2                | 6                | 0              | 4.123469                | -0.959506 | -0.077387 |
| 3                | 6                | 0              | 3.299151                | 0.166123  | 0.046288  |
| 4                | 6                | 0              | 3.806817                | 1.426994  | -0.288677 |
| 5                | 6                | 0              | 5.125302                | 1.565087  | -0.722503 |
| 6                | 6                | 0              | 5.944712                | 0.441311  | -0.837273 |
| 7                | 1                | 0              | 6.068697                | -1.699890 | -0.616721 |
| 8                | 1                | 0              | 3.717884                | -1.939858 | 0.151751  |
| 9                | 1                | 0              | 3.167318                | 2.302307  | -0.207632 |

|    |   |   |           |           |           |
|----|---|---|-----------|-----------|-----------|
| 10 | 1 | 0 | 5.508979  | 2.548610  | -0.977307 |
| 11 | 1 | 0 | 6.969536  | 0.546690  | -1.180772 |
| 12 | 6 | 0 | 1.899011  | 0.053252  | 0.542219  |
| 13 | 6 | 0 | 1.540194  | -0.668172 | 1.777034  |
| 14 | 8 | 0 | 1.288757  | -1.264398 | 0.485761  |
| 15 | 1 | 0 | 2.321960  | -1.163407 | 2.349148  |
| 16 | 1 | 0 | 0.647143  | -0.359617 | 2.314720  |
| 17 | 1 | 0 | 1.215708  | 0.849281  | 0.251688  |
| 18 | 1 | 0 | -0.378358 | -1.274152 | 0.013579  |
| 19 | 8 | 0 | -1.341326 | -1.253907 | -0.230508 |
| 20 | 6 | 0 | -1.877397 | -0.134755 | 0.266543  |
| 21 | 8 | 0 | -1.236020 | 0.688140  | 0.908589  |
| 22 | 6 | 0 | -3.329659 | 0.016514  | -0.034598 |
| 23 | 6 | 0 | -3.989831 | 1.158675  | 0.437155  |
| 24 | 6 | 0 | -4.037509 | -0.945074 | -0.768424 |
| 25 | 6 | 0 | -5.345837 | 1.338647  | 0.177774  |
| 26 | 1 | 0 | -3.420815 | 1.888573  | 1.002652  |
| 27 | 6 | 0 | -5.394922 | -0.761561 | -1.025846 |
| 28 | 1 | 0 | -3.518969 | -1.825594 | -1.129751 |
| 29 | 6 | 0 | -6.049571 | 0.378494  | -0.554009 |
| 30 | 1 | 0 | -5.855213 | 2.224844  | 0.544433  |
| 31 | 1 | 0 | -5.942708 | -1.507107 | -1.594497 |
| 32 | 1 | 0 | -7.107599 | 0.518796  | -0.756427 |

-----

**TSA uncatalyzed**

**Energy: -671.763631 (Hartrees)**

| Atomic | Coordinates (Angstroms) |                   |                   |
|--------|-------------------------|-------------------|-------------------|
| Type   | X                       | Y                 | Z                 |
| C      | 6.73366090087869        | 3.27886385805789  | 0.40251166462363  |
| C      | 4.65760795003608        | 1.82094005624930  | 1.09490732249046  |
| C      | 4.42951822784731        | -0.65875852717277 | 0.19672048205293  |
| C      | 6.28617383951788        | -1.66673849704640 | -1.40066494715347 |
| C      | 8.36562841265877        | -0.20182274448014 | -2.08795839928487 |
| C      | 8.58597054875289        | 2.27315165402055  | -1.19449585715228 |

|   |                    |                   |                   |
|---|--------------------|-------------------|-------------------|
| H | 6.93094860690475   | 5.19069961808718  | 1.12363119549516  |
| H | 3.23558915814143   | 2.49727296835437  | 2.41072356663172  |
| H | 6.12044506622582   | -3.59955043060218 | -2.08002158546469 |
| H | 9.81467026735385   | -0.98775986821086 | -3.31117812944185 |
| H | 10.21132449719621  | 3.40982175757747  | -1.72248531946796 |
| C | 2.13576851938009   | -2.39390514206928 | 1.53918187967440  |
| C | 0.92539886451210   | -1.77350794374004 | -0.85755770229401 |
| H | 0.08522664823721   | 0.08239205904972  | -1.05390021833495 |
| H | 1.23966037201086   | -2.84290401078625 | -2.58438938051109 |
| H | 2.99105856922136   | -4.31084310783400 | 1.55146511082521  |
| O | 1.10624564522536   | -1.53200096764258 | 3.59236940707651  |
| N | -2.89997374731996  | -2.82230595633957 | 0.57334292522032  |
| H | -3.38034209427826  | -4.64626951391762 | 0.24849899677501  |
| C | -4.82239192829579  | -1.05049871130996 | 0.12113143894291  |
| C | -6.84307640445351  | -1.58056687803231 | -1.51121402373135 |
| C | -4.65401754976709  | 1.34283942032524  | 1.26044731781182  |
| C | -8.67459921802060  | 0.25284535552414  | -1.97740932459671 |
| H | -6.97611312176333  | -3.42758520204967 | -2.40240874333585 |
| C | -6.49423274446119  | 3.15981095533602  | 0.77138619666348  |
| H | -3.08119836932328  | 1.71776100793492  | 2.52580783662122  |
| C | -8.51302718079937  | 2.63163271504964  | -0.84603037482127 |
| H | -10.23815810550396 | -0.18330343979356 | -3.23426635552311 |
| H | -6.35344798941217  | 4.99983759693682  | 1.67070690490136  |
| H | -9.94430581400993  | 4.05308449462049  | -1.21736162074348 |
| H | -1.91523738043785  | -2.54527209129770 | 2.25727779772333  |

### TSA\_model-1

**Energy: -1043.478482 (Hartrees)**

| Atomic | Coordinates (Angstroms) |                   |                   |
|--------|-------------------------|-------------------|-------------------|
| Type   | X                       | Y                 | Z                 |
| C      | 6.73366090087869        | 3.27886385805789  | 0.40251166462363  |
| C      | 4.65760795003608        | 1.82094005624930  | 1.09490732249046  |
| C      | 4.42951822784731        | -0.65875852717277 | 0.19672048205293  |
| C      | 6.28617383951788        | -1.66673849704640 | -1.40066494715347 |
| C      | 8.36562841265877        | -0.20182274448014 | -2.08795839928487 |

|    |                    |                   |                   |
|----|--------------------|-------------------|-------------------|
| C  | 8.58597054875289   | 2.27315165402055  | -1.19449585715228 |
| H  | 6.93094860690475   | 5.19069961808718  | 1.12363119549516  |
| H  | 3.23558915814143   | 2.49727296835437  | 2.41072356663172  |
| H  | 6.12044506622582   | -3.59955043060218 | -2.08002158546469 |
| H  | 9.81467026735385   | -0.98775986821086 | -3.31117812944185 |
| H  | 10.21132449719621  | 3.40982175757747  | -1.72248531946796 |
| C  | 2.13576851938009   | -2.39390514206928 | 1.53918187967440  |
| C  | 0.92539886451210   | -1.77350794374004 | -0.85755770229401 |
| H  | 0.08522664823721   | 0.08239205904972  | -1.05390021833495 |
| H  | 1.23966037201086   | -2.84290401078625 | -2.58438938051109 |
| H  | 2.99105856922136   | -4.31084310783400 | 1.55146511082521  |
| O  | 1.10624564522536   | -1.53200096764258 | 3.59236940707651  |
| N  | -2.89997374731996  | -2.82230595633957 | 0.57334292522032  |
| H  | -3.38034209427826  | -4.64626951391762 | 0.24849899677501  |
| C  | -4.82239192829579  | -1.05049871130996 | 0.12113143894291  |
| C  | -6.84307640445351  | -1.58056687803231 | -1.51121402373135 |
| C  | -4.65401754976709  | 1.34283942032524  | 1.26044731781182  |
| C  | -8.67459921802060  | 0.25284535552414  | -1.97740932459671 |
| H  | -6.97611312176333  | -3.42758520204967 | -2.40240874333585 |
| C  | -6.49423274446119  | 3.15981095533602  | 0.77138619666348  |
| H  | -3.08119836932328  | 1.71776100793492  | 2.52580783662122  |
| C  | -8.51302718079937  | 2.63163271504964  | -0.84603037482127 |
| H  | -10.23815810550396 | -0.18330343979356 | -3.23426635552311 |
| H  | -6.35344798941217  | 4.99983759693682  | 1.67070690490136  |
| H  | -9.94430581400993  | 4.05308449462049  | -1.21736162074348 |
| H  | -1.91523738043785  | -2.54527209129770 | 2.25727779772333  |
| Fe | 3.56836973222128   | -0.60244469242741 | 5.80656150962123  |
| Fe | 3.51923703438516   | 3.40490855657989  | 7.58403774783266  |
| Fe | 6.75614899514490   | -3.42512860155088 | 6.85158000572008  |

### TSA\_model-2

**Energy: -950.390074 (Hartrees)**

| Atomic | Coordinates (Angstroms) |                  |                  |
|--------|-------------------------|------------------|------------------|
| Type   | X                       | Y                | Z                |
| C      | 6.73366090087869        | 3.27886385805789 | 0.40251166462363 |

|    |                    |                   |                   |
|----|--------------------|-------------------|-------------------|
| C  | 4.65760795003608   | 1.82094005624930  | 1.09490732249046  |
| C  | 4.42951822784731   | -0.65875852717277 | 0.19672048205293  |
| C  | 6.28617383951788   | -1.66673849704640 | -1.40066494715347 |
| C  | 8.36562841265877   | -0.20182274448014 | -2.08795839928487 |
| C  | 8.58597054875289   | 2.27315165402055  | -1.19449585715228 |
| H  | 6.93094860690475   | 5.19069961808718  | 1.12363119549516  |
| H  | 3.23558915814143   | 2.49727296835437  | 2.41072356663172  |
| H  | 6.12044506622582   | -3.59955043060218 | -2.08002158546469 |
| H  | 9.81467026735385   | -0.98775986821086 | -3.31117812944185 |
| H  | 10.21132449719621  | 3.40982175757747  | -1.72248531946796 |
| C  | 2.13576851938009   | -2.39390514206928 | 1.53918187967440  |
| C  | 0.92539886451210   | -1.77350794374004 | -0.85755770229401 |
| H  | 0.08522664823721   | 0.08239205904972  | -1.05390021833495 |
| H  | 1.23966037201086   | -2.84290401078625 | -2.58438938051109 |
| H  | 2.99105856922136   | -4.31084310783400 | 1.55146511082521  |
| O  | 1.10624564522536   | -1.53200096764258 | 3.59236940707651  |
| N  | -2.89997374731996  | -2.82230595633957 | 0.57334292522032  |
| H  | -3.38034209427826  | -4.64626951391762 | 0.24849899677501  |
| C  | -4.82239192829579  | -1.05049871130996 | 0.12113143894291  |
| C  | -6.84307640445351  | -1.58056687803231 | -1.51121402373135 |
| C  | -4.65401754976709  | 1.34283942032524  | 1.26044731781182  |
| C  | -8.67459921802060  | 0.25284535552414  | -1.97740932459671 |
| H  | -6.97611312176333  | -3.42758520204967 | -2.40240874333585 |
| C  | -6.49423274446119  | 3.15981095533602  | 0.77138619666348  |
| H  | -3.08119836932328  | 1.71776100793492  | 2.52580783662122  |
| C  | -8.51302718079937  | 2.63163271504964  | -0.84603037482127 |
| H  | -10.23815810550396 | -0.18330343979356 | -3.23426635552311 |
| H  | -6.35344798941217  | 4.99983759693682  | 1.67070690490136  |
| H  | -9.94430581400993  | 4.05308449462049  | -1.21736162074348 |
| H  | -1.91523738043785  | -2.54527209129770 | 2.25727779772333  |
| Fe | 3.56836973222128   | -0.60244469242741 | 5.80656150962123  |
| Fe | 6.75614899514490   | -3.42512860155088 | 6.85158000572008  |
| Sr | 3.51923703438516   | 3.40490855657989  | 7.58403774783266  |

**TSA\_model-3**

**Energy: -950.290851 (Hartrees)**

| Atomic | Coordinates (Angstroms) |                   |                   |
|--------|-------------------------|-------------------|-------------------|
| Type   | X                       | Y                 | Z                 |
| C      | 6.73366090087869        | 3.27886385805789  | 0.40251166462363  |
| C      | 4.65760795003608        | 1.82094005624930  | 1.09490732249046  |
| C      | 4.42951822784731        | -0.65875852717277 | 0.19672048205293  |
| C      | 6.28617383951788        | -1.66673849704640 | -1.40066494715347 |
| C      | 8.36562841265877        | -0.20182274448014 | -2.08795839928487 |
| C      | 8.58597054875289        | 2.27315165402055  | -1.19449585715228 |
| H      | 6.93094860690475        | 5.19069961808718  | 1.12363119549516  |
| H      | 3.23558915814143        | 2.49727296835437  | 2.41072356663172  |
| H      | 6.12044506622582        | -3.59955043060218 | -2.08002158546469 |
| H      | 9.81467026735385        | -0.98775986821086 | -3.31117812944185 |
| H      | 10.21132449719621       | 3.40982175757747  | -1.72248531946796 |
| C      | 2.13576851938009        | -2.39390514206928 | 1.53918187967440  |
| C      | 0.92539886451210        | -1.77350794374004 | -0.85755770229401 |
| H      | 0.08522664823721        | 0.08239205904972  | -1.05390021833495 |
| H      | 1.23966037201086        | -2.84290401078625 | -2.58438938051109 |
| H      | 2.99105856922136        | -4.31084310783400 | 1.55146511082521  |
| O      | 1.10624564522536        | -1.53200096764258 | 3.59236940707651  |
| N      | -2.89997374731996       | -2.82230595633957 | 0.57334292522032  |
| H      | -3.38034209427826       | -4.64626951391762 | 0.24849899677501  |
| C      | -4.82239192829579       | -1.05049871130996 | 0.12113143894291  |
| C      | -6.84307640445351       | -1.58056687803231 | -1.51121402373135 |
| C      | -4.65401754976709       | 1.34283942032524  | 1.26044731781182  |
| C      | -8.67459921802060       | 0.25284535552414  | -1.97740932459671 |
| H      | -6.97611312176333       | -3.42758520204967 | -2.40240874333585 |
| C      | -6.49423274446119       | 3.15981095533602  | 0.77138619666348  |
| H      | -3.08119836932328       | 1.71776100793492  | 2.52580783662122  |
| C      | -8.51302718079937       | 2.63163271504964  | -0.84603037482127 |
| H      | -10.23815810550396      | -0.18330343979356 | -3.23426635552311 |
| H      | -6.35344798941217       | 4.99983759693682  | 1.67070690490136  |
| H      | -9.94430581400993       | 4.05308449462049  | -1.21736162074348 |
| H      | -1.91523738043785       | -2.54527209129770 | 2.25727779772333  |
| Fe     | 6.75614899514490        | -3.42512860155088 | 6.85158000572008  |



|    |                  |                   |                  |
|----|------------------|-------------------|------------------|
| Sr | 3.56836973222128 | -0.60244469242741 | 5.80656150962123 |
| Fe | 3.51923703438516 | 3.40490855657989  | 7.58403774783266 |

**IMA1\_model-1**

**Energy: -1043.5110054 (Hartrees)**

| Atomic | Coordinates (Angstroms) |           |           |
|--------|-------------------------|-----------|-----------|
| Type   | X                       | Y         | Z         |
| C      | 0.187531                | -0.371001 | -0.345840 |
| C      | 0.123880                | -0.780207 | 0.978244  |
| C      | 1.264760                | -0.683232 | 1.838593  |
| C      | 2.452614                | -0.116428 | 1.273156  |
| C      | 2.500783                | 0.287673  | -0.051516 |
| C      | 1.374801                | 0.155784  | -0.878891 |
| H      | -0.700247               | -0.461795 | -0.975397 |
| H      | -0.818166               | -1.160618 | 1.375022  |
| H      | 3.327569                | 0.011195  | 1.912576  |
| H      | 3.418204                | 0.721344  | -0.450070 |
| H      | 1.415027                | 0.467298  | -1.922237 |
| C      | 1.248121                | -1.104673 | 3.182175  |
| C      | 0.057051                | -1.648189 | 3.877759  |
| O      | -0.787342               | -0.556161 | 4.336449  |
| H      | -0.549326               | -2.288684 | 3.215636  |
| H      | 0.348805                | -2.246623 | 4.756033  |
| H      | 2.152685                | -0.937822 | 3.770634  |
| N      | 0.866863                | 1.996159  | 5.064076  |
| H      | 1.345258                | 1.598411  | 5.867702  |
| C      | 1.628925                | 2.903963  | 4.330980  |
| C      | 2.797343                | 3.474397  | 4.874533  |
| C      | 1.222009                | 3.314051  | 3.045137  |
| C      | 3.523542                | 4.428331  | 4.162593  |
| H      | 3.132296                | 3.159502  | 5.865959  |
| C      | 1.955007                | 4.268995  | 2.342404  |
| H      | 0.324216                | 2.877188  | 2.604249  |
| C      | 3.109200                | 4.837482  | 2.892316  |
| H      | 4.424342                | 4.855412  | 4.605499  |

|    |           |           |          |
|----|-----------|-----------|----------|
| H  | 1.621466  | 4.571280  | 1.347606 |
| H  | 3.683114  | 5.579150  | 2.337405 |
| H  | 0.366079  | 1.272772  | 4.541158 |
| Fe | -2.156482 | -0.251833 | 5.371334 |
| Fe | -2.873529 | -0.268720 | 7.508355 |
| Fe | -3.948698 | -1.147901 | 6.005365 |

-----

**IMA1\_model-2**

**Energy: -950.4204611 (Hartrees)**

| Atomic | Coordinates (Angstroms) |           |           |
|--------|-------------------------|-----------|-----------|
| Type   | X                       | Y         | Z         |
| C      | 0.207718                | -1.438824 | -0.460992 |
| C      | 0.292239                | -1.001777 | 0.864958  |
| C      | 1.490643                | -0.467296 | 1.361177  |
| C      | 2.597422                | -0.381004 | 0.504945  |
| C      | 2.515295                | -0.821585 | -0.816745 |
| C      | 1.317067                | -1.352728 | -1.304760 |
| H      | -0.732458               | -1.850815 | -0.832977 |
| H      | -0.570611               | -1.069802 | 1.529014  |
| H      | 3.530711                | 0.045103  | 0.879349  |
| H      | 3.384719                | -0.742210 | -1.470158 |
| H      | 1.250569                | -1.696660 | -2.337951 |
| C      | 1.590477                | 0.093534  | 2.774294  |
| C      | 0.748268                | -0.660018 | 3.842461  |
| O      | -0.619819               | -0.370597 | 3.785112  |
| H      | 0.918659                | -1.742732 | 3.676943  |
| H      | 1.165058                | -0.425701 | 4.841863  |
| H      | 2.646686                | 0.014570  | 3.083049  |
| N      | 1.260465                | 1.522721  | 2.679322  |
| H      | -2.240034               | 2.108839  | 4.895039  |
| C      | 1.490161                | 2.486379  | 3.626131  |
| C      | 2.356367                | 2.307218  | 4.737592  |
| C      | 0.876555                | 3.764168  | 3.459809  |
| C      | 2.658688                | 3.395331  | 5.591183  |

|    |           |          |          |
|----|-----------|----------|----------|
| H  | 2.844179  | 1.347584 | 4.902267 |
| C  | 1.180699  | 4.832458 | 4.325087 |
| H  | 0.222631  | 3.927613 | 2.601333 |
| C  | 2.073909  | 4.659271 | 5.397628 |
| H  | 3.380277  | 3.250987 | 6.397299 |
| H  | 0.733938  | 5.809745 | 4.135422 |
| H  | 2.334423  | 5.497919 | 6.045391 |
| H  | 0.456632  | 1.697827 | 2.081099 |
| Fe | -1.520875 | 0.704747 | 4.911608 |
| Sr | -0.285911 | 2.918585 | 6.078144 |
| Fe | -1.517045 | 0.393648 | 6.875065 |

---

### IMA1\_model-3

**Energy: -950.36369 (Hartrees)**

| Atomic | Coordinates (Angstroms) |                   |                   |
|--------|-------------------------|-------------------|-------------------|
| Type   | X                       | Y                 | Z                 |
| C      | 0.04515377554501        | -0.05090706562982 | -0.01028162757004 |
| C      | 0.05250527126441        | -0.09524689455882 | 2.62609416777250  |
| C      | 2.34816710100094        | -0.05154903016092 | 3.95741706040981  |
| C      | 4.61779506964362        | 0.02842048314451  | 2.59168741209896  |
| C      | 4.60716714787144        | 0.07545024461586  | -0.04457659082548 |
| C      | 2.31692715403685        | 0.03970977693509  | -1.35468351691913 |
| H      | -1.74789800301808       | -0.09707699037594 | -1.01639566863978 |
| H      | -1.72193473642308       | -0.18748479710608 | 3.66073003043993  |
| H      | 6.41113617094563        | 0.05970855765356  | 3.60227114489338  |
| H      | 6.38807793685888        | 0.13552320949646  | -1.07105067344673 |
| H      | 2.30140177457544        | 0.07080909048096  | -3.41080039004582 |
| C      | 2.43789114812727        | -0.13217846228536 | 6.81794154465882  |
| C      | 0.50361388502938        | -1.89280373485048 | 8.07457390982567  |
| O      | -1.81352779071717       | -0.48880464562893 | 8.05664316034072  |
| H      | 0.29167540825626        | -3.67034451098853 | 7.03406445710833  |
| H      | 1.07322625277347        | -2.32587550990584 | 10.03012754645254 |
| H      | 4.33536088323175        | -0.79283517210753 | 7.35791654389966  |
| N      | 1.86233550668241        | 2.42898331176585  | 8.04885137355201  |

|    |                   |                   |                   |
|----|-------------------|-------------------|-------------------|
| H  | 2.22329261538184  | 2.20282309821646  | 9.94529912965027  |
| C  | 3.23632350382387  | 4.61177767710476  | 7.18119243316440  |
| C  | 5.24490937696291  | 5.51058560815862  | 8.65235920888980  |
| C  | 2.52895534177830  | 5.89185008229383  | 4.97127628384257  |
| C  | 6.54937901192022  | 7.67888249733373  | 7.91580902485833  |
| H  | 5.78678406118542  | 4.51483033138962  | 10.37368147184769 |
| C  | 3.86732441464390  | 8.03740575405746  | 4.23301195569928  |
| H  | 0.94239835318320  | 5.21511800333938  | 3.85872142323178  |
| C  | 5.87466374128294  | 8.94338344775901  | 5.69683615332287  |
| H  | 8.09856997908346  | 8.37001723922311  | 9.07696264307835  |
| H  | 3.31685189607186  | 9.02228636940387  | 2.51435128506105  |
| H  | 6.89561832506639  | 10.63115408446081 | 5.11900321426313  |
| H  | 0.02542456047882  | 1.99767479858375  | 8.13829182758903  |
| Sr | -4.49855057514884 | -1.30090313972379 | 10.38307038334766 |
| Fe | -6.72980339538084 | 0.21608638782296  | 13.41193999694440 |
| Fe | -5.79037988118894 | -5.13675115731193 | 10.01615263625408 |

### IMA2\_model-1

**Energy: -1043.535442 (Hartrees)**

| Atomic | Coordinates (Angstroms) |                   |                   |
|--------|-------------------------|-------------------|-------------------|
| Type   | X                       | Y                 | Z                 |
| C      | 0.00529123314998        | 0.00037794522500  | 0.00018897261250  |
| C      | 0.00415739747499        | -0.00321253441249 | 2.63711270349362  |
| C      | 2.29091487361534        | -0.00151178089999 | 3.98108592169933  |
| C      | 4.56198770984565        | -0.00510226053748 | 2.62142807681166  |
| C      | 4.56463331508228        | 0.00151178089999  | -0.01549575422495 |
| C      | 2.28203326476281        | 0.00661404143748  | -1.33433559229153 |
| H      | -1.78049996441759       | -0.01020452107497 | -1.01194832103681 |
| H      | -1.77634255371452       | -0.02645616574991 | 3.65284054103110  |
| H      | 6.34721198390654        | -0.00548020576248 | 3.63810070938149  |
| H      | 6.34683397632058        | -0.00207869873749 | -1.03368017336396 |
| H      | 2.27523024693338        | 0.00604712359998  | -3.38695610736985 |
| C      | 2.39447192951568        | -0.03477096069988 | 6.85176878369079  |
| C      | 0.43199138272490        | -1.79089349400985 | 8.09747615646944  |
| O      | -1.99611778897868       | -0.52666665969736 | 8.11958624314968  |

|    |                   |                   |                   |
|----|-------------------|-------------------|-------------------|
| H  | 0.20957062726179  | -3.55381890530952 | 7.05396969260415  |
| H  | 0.98738186062490  | -2.23252233257359 | 10.04332767649865 |
| H  | 4.27248183568226  | -0.75343380414522 | 7.38278208559619  |
| N  | 1.94528405606087  | 2.49443858325730  | 8.04210767989482  |
| H  | 2.28033245266880  | 2.29148188593914  | 9.92748693969268  |
| C  | 3.34160281265083  | 4.65042714949810  | 7.17850280864740  |
| C  | 5.33866517178445  | 5.60436060070786  | 8.63245786622979  |
| C  | 2.65789976078841  | 5.90180374033598  | 4.94692504433904  |
| C  | 6.63048185445404  | 7.77546745782878  | 7.87637890660276  |
| H  | 5.87704805030882  | 4.64513593902483  | 10.36968324222476 |
| C  | 3.98203071484196  | 8.04550930219310  | 4.17856240569610  |
| H  | 1.08602560025436  | 5.19939244896901  | 3.83822279861489  |
| C  | 5.96681029446932  | 8.99660791855098  | 5.63667509885896  |
| H  | 8.16229438238688  | 8.49923236905953  | 9.03534764993323  |
| H  | 3.43533301302173  | 8.99604113110458  | 2.44341584749137  |
| H  | 6.97479031914501  | 10.68073196397746 | 5.03838764894900  |
| H  | -1.56960656288338 | 1.28501377822372  | 8.25678014817489  |
| Fe | -4.65836396520800 | -1.51234782161182 | 10.45717743709004 |
| Fe | -7.22593492115666 | -0.08862815526220 | 13.71298641532505 |
| Fe | -5.63913192423516 | -5.71755528252238 | 9.69826364450084  |

## IMA2\_model-2

**Energy: -950.400286 (Hartrees)**

| Atomic | Coordinates (Angstroms) |                   |                   |
|--------|-------------------------|-------------------|-------------------|
| Type   | X                       | Y                 | Z                 |
| C      | 0.00529123314998        | 0.00037794522500  | 0.00018897261250  |
| C      | 0.00415739747499        | -0.00321253441249 | 2.63711270349362  |
| C      | 2.29091487361534        | -0.00151178089999 | 3.98108592169933  |
| C      | 4.56198770984565        | -0.00510226053748 | 2.62142807681166  |
| C      | 4.56463331508228        | 0.00151178089999  | -0.01549575422495 |
| C      | 2.28203326476281        | 0.00661404143748  | -1.33433559229153 |
| H      | -1.78049996441759       | -0.01020452107497 | -1.01194832103681 |
| H      | -1.77634255371452       | -0.02645616574991 | 3.65284054103110  |
| H      | 6.34721198390654        | -0.00548020576248 | 3.63810070938149  |
| H      | 6.34683397632058        | -0.00207869873749 | -1.03368017336396 |

|    |                   |                   |                   |
|----|-------------------|-------------------|-------------------|
| H  | 2.27523024693338  | 0.00604712359998  | -3.38695610736985 |
| C  | 2.39447192951568  | -0.03477096069988 | 6.85176878369079  |
| C  | 0.43199138272490  | -1.79089349400985 | 8.09747615646944  |
| O  | -1.99611778897868 | -0.52666665969736 | 8.11958624314968  |
| H  | 0.20957062726179  | -3.55381890530952 | 7.05396969260415  |
| H  | 0.98738186062490  | -2.23252233257359 | 10.04332767649865 |
| H  | 4.27248183568226  | -0.75343380414522 | 7.38278208559619  |
| N  | 1.94528405606087  | 2.49443858325730  | 8.04210767989482  |
| H  | 2.28033245266880  | 2.29148188593914  | 9.92748693969268  |
| C  | 3.34160281265083  | 4.65042714949810  | 7.17850280864740  |
| C  | 5.33866517178445  | 5.60436060070786  | 8.63245786622979  |
| C  | 2.65789976078841  | 5.90180374033598  | 4.94692504433904  |
| C  | 6.63048185445404  | 7.77546745782878  | 7.87637890660276  |
| H  | 5.87704805030882  | 4.64513593902483  | 10.36968324222476 |
| C  | 3.98203071484196  | 8.04550930219310  | 4.17856240569610  |
| H  | 1.08602560025436  | 5.19939244896901  | 3.83822279861489  |
| C  | 5.96681029446932  | 8.99660791855098  | 5.63667509885896  |
| H  | 8.16229438238688  | 8.49923236905953  | 9.03534764993323  |
| H  | 3.43533301302173  | 8.99604113110458  | 2.44341584749137  |
| H  | 6.97479031914501  | 10.68073196397746 | 5.03838764894900  |
| H  | -1.56960656288338 | 1.28501377822372  | 8.25678014817489  |
| Fe | -5.63913192423516 | -5.71755528252238 | 9.69826364450084  |
| Sr | -7.22593492115666 | -0.08862815526220 | 13.71298641532505 |
| Fe | -4.65836396520800 | -1.51234782161182 | 10.45717743709004 |

### IMA2\_model-3

**Energy: -950.331519 (Hartrees)**

| Atomic | Coordinates (Angstroms) |                   |                   |
|--------|-------------------------|-------------------|-------------------|
| Type   | X                       | Y                 | Z                 |
| C      | 0.00529123314998        | 0.00037794522500  | 0.00018897261250  |
| C      | 0.00415739747499        | -0.00321253441249 | 2.63711270349362  |
| C      | 2.29091487361534        | -0.00151178089999 | 3.98108592169933  |
| C      | 4.56198770984565        | -0.00510226053748 | 2.62142807681166  |
| C      | 4.56463331508228        | 0.00151178089999  | -0.01549575422495 |
| C      | 2.28203326476281        | 0.00661404143748  | -1.33433559229153 |

|    |                   |                   |                   |
|----|-------------------|-------------------|-------------------|
| H  | -1.78049996441759 | -0.01020452107497 | -1.01194832103681 |
| H  | -1.77634255371452 | -0.02645616574991 | 3.65284054103110  |
| H  | 6.34721198390654  | -0.00548020576248 | 3.63810070938149  |
| H  | 6.34683397632058  | -0.00207869873749 | -1.03368017336396 |
| H  | 2.27523024693338  | 0.00604712359998  | -3.38695610736985 |
| C  | 2.39447192951568  | -0.03477096069988 | 6.85176878369079  |
| C  | 0.43199138272490  | -1.79089349400985 | 8.09747615646944  |
| O  | -1.99611778897868 | -0.52666665969736 | 8.11958624314968  |
| H  | 0.20957062726179  | -3.55381890530952 | 7.05396969260415  |
| H  | 0.98738186062490  | -2.23252233257359 | 10.04332767649865 |
| H  | 4.27248183568226  | -0.75343380414522 | 7.38278208559619  |
| N  | 1.94528405606087  | 2.49443858325730  | 8.04210767989482  |
| H  | 2.28033245266880  | 2.29148188593914  | 9.92748693969268  |
| C  | 3.34160281265083  | 4.65042714949810  | 7.17850280864740  |
| C  | 5.33866517178445  | 5.60436060070786  | 8.63245786622979  |
| C  | 2.65789976078841  | 5.90180374033598  | 4.94692504433904  |
| C  | 6.63048185445404  | 7.77546745782878  | 7.87637890660276  |
| H  | 5.87704805030882  | 4.64513593902483  | 10.36968324222476 |
| C  | 3.98203071484196  | 8.04550930219310  | 4.17856240569610  |
| H  | 1.08602560025436  | 5.19939244896901  | 3.83822279861489  |
| C  | 5.96681029446932  | 8.99660791855098  | 5.63667509885896  |
| H  | 8.16229438238688  | 8.49923236905953  | 9.03534764993323  |
| H  | 3.43533301302173  | 8.99604113110458  | 2.44341584749137  |
| H  | 6.97479031914501  | 10.68073196397746 | 5.03838764894900  |
| H  | -1.56960656288338 | 1.28501377822372  | 8.25678014817489  |
| Fe | -7.22593492115666 | -0.08862815526220 | 13.71298641532505 |
| Fe | -5.63913192423516 | -5.71755528252238 | 9.69826364450084  |
| Sr | -4.65836396520800 | -1.51234782161182 | 10.45717743709004 |

### Product 3

Energy: -671.848864 (Hartrees)

| Atomic Type | Coordinates (Angstroms) |                   |                   |
|-------------|-------------------------|-------------------|-------------------|
|             | X                       | Y                 | Z                 |
| C           | -5.28839867606785       | -2.70174147302868 | -1.78786988118726 |
| C           | -4.10127262230167       | -0.38644900200982 | -1.36646097421095 |

|   |                   |                   |                   |
|---|-------------------|-------------------|-------------------|
| C | -2.58760199807153 | -0.02267671349992 | 0.78177972436601  |
| C | -2.30981234273515 | -2.02824305751452 | 2.48650154455971  |
| C | -3.49391455880133 | -4.34655922639365 | 2.06509274907724  |
| C | -4.98528631838051 | -4.69124524891577 | -0.08031336031223 |
| H | -6.46191869795463 | -2.94891766718538 | -3.45404147740370 |
| H | -4.37093645908003 | 1.16766179908970  | -2.67282859528614 |
| H | -1.14290633393996 | -1.77426384741812 | 4.15777557327871  |
| H | -3.24976197746723 | -5.87685927233811 | 3.41095555734767  |
| H | -5.91181937383612 | -6.49158713922455 | -0.41630667289499 |
| C | -1.28274606907921 | 2.47402953354846  | 1.34132761296908  |
| C | -2.96044488127454 | 4.81785673488417  | 0.88647052145504  |
| O | -3.29965069047527 | 5.33960996681681  | -1.71587130637637 |
| H | -4.82560477073364 | 4.52740606568842  | 1.72872143646742  |
| H | -2.08455677887631 | 6.44793465659954  | 1.85495513972727  |
| H | -0.78725988288534 | 2.45173067078723  | 3.36427946001034  |
| N | 1.03216836600780  | 2.93039820565153  | -0.21259418339260 |
| H | 1.78125586809567  | 4.59449098596745  | 0.39854322842279  |
| C | 3.01449100687539  | 1.10152133558205  | -0.26399473210270 |
| C | 5.31806711733777  | 1.60607824686013  | 0.94637486985296  |
| C | 2.75748840883380  | -1.15915797105600 | -1.62592039762873 |
| C | 7.32136593173184  | -0.10091137318493 | 0.80105491950259  |
| H | 5.53992128566546  | 3.35350803621568  | 2.00726699548188  |
| C | 4.74982656792823  | -2.87786388740685 | -1.72664273206075 |
| H | 1.00741301424162  | -1.54617390035195 | -2.61424705139627 |
| C | 7.04149768348263  | -2.36234666097983 | -0.52250924899429 |
| H | 9.09355096135973  | 0.33523740134578  | 1.74081566288039  |
| H | 4.51682319498707  | -4.62113626605932 | -2.78526726192873 |
| H | 8.59258455995475  | -3.70102866871228 | -0.62814495260951 |
| H | -1.68469083287288 | 4.91990175666121  | -2.48914714790662 |

### TSB\_uncatalyzed

Energy: -671.977586 (Hartrees)

| Atomic | Coordinates (Angstroms) |                   |                  |
|--------|-------------------------|-------------------|------------------|
| Type   | X                       | Y                 | Z                |
| C      | 5.54445647907708        | -1.27726585386810 | 2.48177734641025 |



|   |                   |                   |                   |
|---|-------------------|-------------------|-------------------|
| C | 3.71576850036188  | 0.49945459404882  | 1.83265638657015  |
| C | 3.13845711059483  | 0.93276883608382  | -0.74058367405417 |
| C | 4.41402215425865  | -0.47942349523416 | -2.60876683807488 |
| C | 6.21512006162908  | -2.27031704593580 | -1.93848104012116 |
| C | 6.78695146106243  | -2.66886018932091 | 0.61094846376933  |
| H | 5.99874678314473  | -1.58907070606601 | 4.45861988356056  |
| H | 2.70741069108791  | 1.61836147801095  | 3.22670732252176  |
| H | 3.98146392928529  | -0.14891041864949 | -4.58976701269540 |
| H | 7.18492759212374  | -3.34576000036621 | -3.39243632069123 |
| H | 8.19857683674839  | -4.06385614329256 | 1.13553641717029  |
| C | 1.27764386334378  | 2.79566090301484  | -1.49382847346154 |
| C | 0.26588446200715  | 4.79763668802345  | 0.13908384657898  |
| O | -0.13133596379733 | 4.46580068220882  | 2.52958746461574  |
| H | 2.19208224263160  | 5.82602553942030  | -0.48339195978090 |
| H | -1.09547422143070 | 5.99137675488122  | -0.94864246561390 |
| H | 1.07903357957682  | 3.11804806088600  | -3.51980382183155 |
| C | -4.79423506761490 | 1.21660571706540  | -1.50554480567212 |
| C | -2.22118412322226 | -2.42432960040085 | -0.37681137609564 |
| C | -6.92868101114380 | -0.70921419581283 | -0.97131922635698 |
| H | -4.64645874164315 | 1.53937088441224  | -3.55306311312528 |
| H | -5.21677811073265 | 3.02998685369691  | -0.61170436744741 |
| C | -4.33692160047947 | -3.51734722133276 | 1.32413106743712  |
| H | -2.38256670595082 | -3.16283456815862 | -2.30678872991255 |
| H | -0.36509510057684 | -2.98916875427924 | 0.33504845329972  |
| H | -7.05963891066338 | -2.10874545846939 | -2.50880040732094 |
| H | -8.75906935030846 | 0.23999522543309  | -0.83790455626325 |
| H | -3.69932785850800 | -3.65529714152989 | 3.28698967661591  |
| H | -4.85281683638218 | -5.43031700411994 | 0.67689992442887  |
| N | -2.36518126906458 | 0.32484392844530  | -0.48773831853002 |
| H | -2.05885651869421 | 1.12457599052752  | 1.25005378821956  |
| O | -6.50783877823032 | -1.92090659849708 | 1.38006700609035  |

### TSB\_Model-1

**Energy: -1043.675045 (Hartrees)**

Atomic Coordinates (Angstroms)

| Type | X                 | Y                 | Z                 |
|------|-------------------|-------------------|-------------------|
| C    | 5.54445647907708  | -1.27726585386810 | 2.48177734641025  |
| C    | 3.71576850036188  | 0.49945459404882  | 1.83265638657015  |
| C    | 3.13845711059483  | 0.93276883608382  | -0.74058367405417 |
| C    | 4.41402215425865  | -0.47942349523416 | -2.60876683807488 |
| C    | 6.21512006162908  | -2.27031704593580 | -1.93848104012116 |
| C    | 6.78695146106243  | -2.66886018932091 | 0.61094846376933  |
| H    | 5.99874678314473  | -1.58907070606601 | 4.45861988356056  |
| H    | 2.70741069108791  | 1.61836147801095  | 3.22670732252176  |
| H    | 3.98146392928529  | -0.14891041864949 | -4.58976701269540 |
| H    | 7.18492759212374  | -3.34576000036621 | -3.39243632069123 |
| H    | 8.19857683674839  | -4.06385614329256 | 1.13553641717029  |
| C    | 1.27764386334378  | 2.79566090301484  | -1.49382847346154 |
| C    | 0.26588446200715  | 4.79763668802345  | 0.13908384657898  |
| O    | -0.13133596379733 | 4.46580068220882  | 2.52958746461574  |
| H    | 2.19208224263160  | 5.82602553942030  | -0.48339195978090 |
| H    | -1.09547422143070 | 5.99137675488122  | -0.94864246561390 |
| H    | 1.07903357957682  | 3.11804806088600  | -3.51980382183155 |
| C    | -4.79423506761490 | 1.21660571706540  | -1.50554480567212 |
| C    | -2.22118412322226 | -2.42432960040085 | -0.37681137609564 |
| C    | -6.92868101114380 | -0.70921419581283 | -0.97131922635698 |
| H    | -4.64645874164315 | 1.53937088441224  | -3.55306311312528 |
| H    | -5.21677811073265 | 3.02998685369691  | -0.61170436744741 |
| C    | -4.33692160047947 | -3.51734722133276 | 1.32413106743712  |
| H    | -2.38256670595082 | -3.16283456815862 | -2.30678872991255 |
| H    | -0.36509510057684 | -2.98916875427924 | 0.33504845329972  |
| H    | -7.05963891066338 | -2.10874545846939 | -2.50880040732094 |
| H    | -8.75906935030846 | 0.23999522543309  | -0.83790455626325 |
| H    | -3.69932785850800 | -3.65529714152989 | 3.28698967661591  |
| H    | -4.85281683638218 | -5.43031700411994 | 0.67689992442887  |
| N    | -2.36518126906458 | 0.32484392844530  | -0.48773831853002 |
| H    | -2.05885651869421 | 1.12457599052752  | 1.25005378821956  |
| O    | -6.50783877823032 | -1.92090659849708 | 1.38006700609035  |
| Fe   | 2.88202129999964  | 4.23789973988048  | 4.17157038501855  |
| Fe   | 3.20025127204514  | 1.87517518469826  | 7.85105642912920  |

Fe 6.40503773750190 6.30998428475786 2.58552317839157

### TSB\_Model-2

Energy: -950.593705 (Hartrees)

| Atomic Type | Coordinates (Angstroms) |                   |                   |
|-------------|-------------------------|-------------------|-------------------|
|             | X                       | Y                 | Z                 |
| C           | 5.54445647907708        | -1.27726585386810 | 2.48177734641025  |
| C           | 3.71576850036188        | 0.49945459404882  | 1.83265638657015  |
| C           | 3.13845711059483        | 0.93276883608382  | -0.74058367405417 |
| C           | 4.41402215425865        | -0.47942349523416 | -2.60876683807488 |
| C           | 6.21512006162908        | -2.27031704593580 | -1.93848104012116 |
| C           | 6.78695146106243        | -2.66886018932091 | 0.61094846376933  |
| H           | 5.99874678314473        | -1.58907070606601 | 4.45861988356056  |
| H           | 2.70741069108791        | 1.61836147801095  | 3.22670732252176  |
| H           | 3.98146392928529        | -0.14891041864949 | -4.58976701269540 |
| H           | 7.18492759212374        | -3.34576000036621 | -3.39243632069123 |
| H           | 8.19857683674839        | -4.06385614329256 | 1.13553641717029  |
| C           | 1.27764386334378        | 2.79566090301484  | -1.49382847346154 |
| C           | 0.26588446200715        | 4.79763668802345  | 0.13908384657898  |
| O           | -0.13133596379733       | 4.46580068220882  | 2.52958746461574  |
| H           | 2.19208224263160        | 5.82602553942030  | -0.48339195978090 |
| H           | -1.09547422143070       | 5.99137675488122  | -0.94864246561390 |
| H           | 1.07903357957682        | 3.11804806088600  | -3.51980382183155 |
| C           | -4.79423506761490       | 1.21660571706540  | -1.50554480567212 |
| C           | -2.22118412322226       | -2.42432960040085 | -0.37681137609564 |
| C           | -6.92868101114380       | -0.70921419581283 | -0.97131922635698 |
| H           | -4.64645874164315       | 1.53937088441224  | -3.55306311312528 |
| H           | -5.21677811073265       | 3.02998685369691  | -0.61170436744741 |
| C           | -4.33692160047947       | -3.51734722133276 | 1.32413106743712  |
| H           | -2.38256670595082       | -3.16283456815862 | -2.30678872991255 |
| H           | -0.36509510057684       | -2.98916875427924 | 0.33504845329972  |
| H           | -7.05963891066338       | -2.10874545846939 | -2.50880040732094 |
| H           | -8.75906935030846       | 0.23999522543309  | -0.83790455626325 |
| H           | -3.69932785850800       | -3.65529714152989 | 3.28698967661591  |
| H           | -4.85281683638218       | -5.43031700411994 | 0.67689992442887  |

|    |                   |                   |                   |
|----|-------------------|-------------------|-------------------|
| N  | -2.36518126906458 | 0.32484392844530  | -0.48773831853002 |
| H  | -2.05885651869421 | 1.12457599052752  | 1.25005378821956  |
| O  | -6.50783877823032 | -1.92090659849708 | 1.38006700609035  |
| Fe | 2.88202129999964  | 4.23789973988048  | 4.17157038501855  |
| Fe | 6.40503773750190  | 6.30998428475786  | 2.58552317839157  |
| Sr | 3.20025127204514  | 1.87517518469826  | 7.85105642912920  |

### TSB\_Model-3

**Energy: -950.49284 (Hartrees)**

| Atomic | Coordinates (Angstroms) |                   |                   |
|--------|-------------------------|-------------------|-------------------|
| Type   | X                       | Y                 | Z                 |
| C      | 5.54445647907708        | -1.27726585386810 | 2.48177734641025  |
| C      | 3.71576850036188        | 0.49945459404882  | 1.83265638657015  |
| C      | 3.13845711059483        | 0.93276883608382  | -0.74058367405417 |
| C      | 4.41402215425865        | -0.47942349523416 | -2.60876683807488 |
| C      | 6.21512006162908        | -2.27031704593580 | -1.93848104012116 |
| C      | 6.78695146106243        | -2.66886018932091 | 0.61094846376933  |
| H      | 5.99874678314473        | -1.58907070606601 | 4.45861988356056  |
| H      | 2.70741069108791        | 1.61836147801095  | 3.22670732252176  |
| H      | 3.98146392928529        | -0.14891041864949 | -4.58976701269540 |
| H      | 7.18492759212374        | -3.34576000036621 | -3.39243632069123 |
| H      | 8.19857683674839        | -4.06385614329256 | 1.13553641717029  |
| C      | 1.27764386334378        | 2.79566090301484  | -1.49382847346154 |
| C      | 0.26588446200715        | 4.79763668802345  | 0.13908384657898  |
| O      | -0.13133596379733       | 4.46580068220882  | 2.52958746461574  |
| H      | 2.19208224263160        | 5.82602553942030  | -0.48339195978090 |
| H      | -1.09547422143070       | 5.99137675488122  | -0.94864246561390 |
| H      | 1.07903357957682        | 3.11804806088600  | -3.51980382183155 |
| C      | -4.79423506761490       | 1.21660571706540  | -1.50554480567212 |
| C      | -2.22118412322226       | -2.42432960040085 | -0.37681137609564 |
| C      | -6.92868101114380       | -0.70921419581283 | -0.97131922635698 |
| H      | -4.64645874164315       | 1.53937088441224  | -3.55306311312528 |
| H      | -5.21677811073265       | 3.02998685369691  | -0.61170436744741 |
| C      | -4.33692160047947       | -3.51734722133276 | 1.32413106743712  |
| H      | -2.38256670595082       | -3.16283456815862 | -2.30678872991255 |

|    |                   |                   |                   |
|----|-------------------|-------------------|-------------------|
| H  | -0.36509510057684 | -2.98916875427924 | 0.33504845329972  |
| H  | -7.05963891066338 | -2.10874545846939 | -2.50880040732094 |
| H  | -8.75906935030846 | 0.23999522543309  | -0.83790455626325 |
| H  | -3.69932785850800 | -3.65529714152989 | 3.28698967661591  |
| H  | -4.85281683638218 | -5.43031700411994 | 0.67689992442887  |
| N  | -2.36518126906458 | 0.32484392844530  | -0.48773831853002 |
| H  | -2.05885651869421 | 1.12457599052752  | 1.25005378821956  |
| O  | -6.50783877823032 | -1.92090659849708 | 1.38006700609035  |
| Fe | 6.40503773750190  | 6.30998428475786  | 2.58552317839157  |
| Sr | 2.88202129999964  | 4.23789973988048  | 4.17157038501855  |
| Fe | 3.20025127204514  | 1.87517518469826  | 7.85105642912920  |

### IMB1\_model-1

**Energy: -1043.704977 (Hartrees)**

| Atomic | Coordinates (Angstroms) |                   |                   |
|--------|-------------------------|-------------------|-------------------|
| Type   | X                       | Y                 | Z                 |
| C      | 6.62443507856367        | -0.88628157529871 | -2.72479612797415 |
| C      | 4.36262163578417        | 0.29876568902313  | -2.04808509489956 |
| C      | 3.70934349200814        | 0.58260254354854  | 0.49813179143050  |
| C      | 5.37740445341189        | -0.31085994378199 | 2.35384283294612  |
| C      | 7.63676152057000        | -1.49004907034443 | 1.68072242501793  |
| C      | 8.26358338899200        | -1.78957069139153 | -0.86719532820819 |
| H      | 7.11198422417022        | -1.08791530181292 | -4.70957525595696 |
| H      | 3.08176538164708        | 1.04898701733737  | -3.46122227794168 |
| H      | 4.92727178492472        | -0.05839253726230 | 4.34561398160648  |
| H      | 8.91270457181978        | -2.16392538195071 | 3.14148072341743  |
| H      | 10.02442998250143       | -2.70363106120367 | -1.39499584247780 |
| C      | 1.24117206598346        | 1.90125356584989  | 1.23833756939255  |
| C      | -0.51948569097375       | 0.15703623909724  | 2.87824189688253  |
| H      | 0.45410118783596        | -1.25213249451596 | 4.02851803231886  |
| H      | -1.72947734014550       | 1.33679230617389  | 4.06064330085471  |
| H      | 1.72777664332479        | 3.50865439045094  | 2.46930511052159  |
| C      | -1.23739266286635       | -3.65529714152989 | 0.10809233434963  |
| C      | -4.93445303521752       | -1.37175218279449 | 1.86308095828529  |
| C      | -3.01808163013206       | -4.73773256639267 | -1.88764741869719 |

|    |                   |                   |                   |
|----|-------------------|-------------------|-------------------|
| H  | -1.12041857793472 | -4.91442176821723 | 1.74213846549871  |
| H  | 0.65422316368579  | -3.32875257106593 | -0.64836505427229 |
| C  | -6.50575995855035 | -2.60271983730710 | -0.21826337310594 |
| H  | -4.96903467937475 | -2.49613916858417 | 3.59671582251743  |
| H  | -5.58905420837900 | 0.55576842879418  | 2.23630196245783  |
| H  | -2.37803128577207 | -6.62443507856367 | -2.43226641422103 |
| H  | -3.00296379089649 | -3.53038624088836 | -3.58443259136661 |
| H  | -8.42704501627794 | -2.92680780727226 | 0.46562851530869  |
| H  | -6.60232499377314 | -1.32734368499756 | -1.86081336063461 |
| O  | -5.50647276475648 | -4.99152277364095 | -0.92880037153709 |
| N  | -2.23686874801450 | -1.16123667735240 | 1.01950724065459  |
| H  | -2.11951688226405 | 0.08995096543942  | -0.39192918698531 |
| O  | -0.14172946504370 | 2.63182149302035  | -0.87683289743059 |
| Fe | -2.54300449553675 | 5.24266737376288  | -0.67463221339463 |
| Fe | -4.93993302366149 | 8.04815490742974  | -3.04208108010988 |
| Fe | -3.45857667270504 | 5.91635456913747  | 3.55967712621686  |

### IMB1\_model-2

**Energy: -950.602611 (Hartrees)**

| Atomic | Coordinates (Angstroms) |                   |                   |
|--------|-------------------------|-------------------|-------------------|
| Type   | X                       | Y                 | Z                 |
| C      | 6.62443507856367        | -0.88628157529871 | -2.72479612797415 |
| C      | 4.36262163578417        | 0.29876568902313  | -2.04808509489956 |
| C      | 3.70934349200814        | 0.58260254354854  | 0.49813179143050  |
| C      | 5.37740445341189        | -0.31085994378199 | 2.35384283294612  |
| C      | 7.63676152057000        | -1.49004907034443 | 1.68072242501793  |
| C      | 8.26358338899200        | -1.78957069139153 | -0.86719532820819 |
| H      | 7.11198422417022        | -1.08791530181292 | -4.70957525595696 |
| H      | 3.08176538164708        | 1.04898701733737  | -3.46122227794168 |
| H      | 4.92727178492472        | -0.05839253726230 | 4.34561398160648  |
| H      | 8.91270457181978        | -2.16392538195071 | 3.14148072341743  |
| H      | 10.02442998250143       | -2.70363106120367 | -1.39499584247780 |
| C      | 1.24117206598346        | 1.90125356584989  | 1.23833756939255  |
| C      | -0.51948569097375       | 0.15703623909724  | 2.87824189688253  |
| H      | 0.45410118783596        | -1.25213249451596 | 4.02851803231886  |

|    |                   |                   |                   |
|----|-------------------|-------------------|-------------------|
| H  | -1.72947734014550 | 1.33679230617389  | 4.06064330085471  |
| H  | 1.72777664332479  | 3.50865439045094  | 2.46930511052159  |
| C  | -1.23739266286635 | -3.65529714152989 | 0.10809233434963  |
| C  | -4.93445303521752 | -1.37175218279449 | 1.86308095828529  |
| C  | -3.01808163013206 | -4.73773256639267 | -1.88764741869719 |
| H  | -1.12041857793472 | -4.91442176821723 | 1.74213846549871  |
| H  | 0.65422316368579  | -3.32875257106593 | -0.64836505427229 |
| C  | -6.50575995855035 | -2.60271983730710 | -0.21826337310594 |
| H  | -4.96903467937475 | -2.49613916858417 | 3.59671582251743  |
| H  | -5.58905420837900 | 0.55576842879418  | 2.23630196245783  |
| H  | -2.37803128577207 | -6.62443507856367 | -2.43226641422103 |
| H  | -3.00296379089649 | -3.53038624088836 | -3.58443259136661 |
| H  | -8.42704501627794 | -2.92680780727226 | 0.46562851530869  |
| H  | -6.60232499377314 | -1.32734368499756 | -1.86081336063461 |
| O  | -5.50647276475648 | -4.99152277364095 | -0.92880037153709 |
| N  | -2.23686874801450 | -1.16123667735240 | 1.01950724065459  |
| H  | -2.11951688226405 | 0.08995096543942  | -0.39192918698531 |
| O  | -0.14172946504370 | 2.63182149302035  | -0.87683289743059 |
| Fe | -2.54300449553675 | 5.24266737376288  | -0.67463221339463 |
| Fe | -3.45857667270504 | 5.91635456913747  | 3.55967712621686  |
| Sr | -4.93993302366149 | 8.04815490742974  | -3.04208108010988 |

### IMB1\_model-3

Energy: -950.53651 (Hartrees)

| Atomic | Coordinates (Angstroms) |                   |                   |
|--------|-------------------------|-------------------|-------------------|
| Type   | X                       | Y                 | Z                 |
| C      | 6.62443507856367        | -0.88628157529871 | -2.72479612797415 |
| C      | 4.36262163578417        | 0.29876568902313  | -2.04808509489956 |
| C      | 3.70934349200814        | 0.58260254354854  | 0.49813179143050  |
| C      | 5.37740445341189        | -0.31085994378199 | 2.35384283294612  |
| C      | 7.63676152057000        | -1.49004907034443 | 1.68072242501793  |
| C      | 8.26358338899200        | -1.78957069139153 | -0.86719532820819 |
| H      | 7.11198422417022        | -1.08791530181292 | -4.70957525595696 |
| H      | 3.08176538164708        | 1.04898701733737  | -3.46122227794168 |
| H      | 4.92727178492472        | -0.05839253726230 | 4.34561398160648  |

|    |                   |                   |                   |
|----|-------------------|-------------------|-------------------|
| H  | 8.91270457181978  | -2.16392538195071 | 3.14148072341743  |
| H  | 10.02442998250143 | -2.70363106120367 | -1.39499584247780 |
| C  | 1.24117206598346  | 1.90125356584989  | 1.23833756939255  |
| C  | -0.51948569097375 | 0.15703623909724  | 2.87824189688253  |
| H  | 0.45410118783596  | -1.25213249451596 | 4.02851803231886  |
| H  | -1.72947734014550 | 1.33679230617389  | 4.06064330085471  |
| H  | 1.72777664332479  | 3.50865439045094  | 2.46930511052159  |
| C  | -1.23739266286635 | -3.65529714152989 | 0.10809233434963  |
| C  | -4.93445303521752 | -1.37175218279449 | 1.86308095828529  |
| C  | -3.01808163013206 | -4.73773256639267 | -1.88764741869719 |
| H  | -1.12041857793472 | -4.91442176821723 | 1.74213846549871  |
| H  | 0.65422316368579  | -3.32875257106593 | -0.64836505427229 |
| C  | -6.50575995855035 | -2.60271983730710 | -0.21826337310594 |
| H  | -4.96903467937475 | -2.49613916858417 | 3.59671582251743  |
| H  | -5.58905420837900 | 0.55576842879418  | 2.23630196245783  |
| H  | -2.37803128577207 | -6.62443507856367 | -2.43226641422103 |
| H  | -3.00296379089649 | -3.53038624088836 | -3.58443259136661 |
| H  | -8.42704501627794 | -2.92680780727226 | 0.46562851530869  |
| H  | -6.60232499377314 | -1.32734368499756 | -1.86081336063461 |
| O  | -5.50647276475648 | -4.99152277364095 | -0.92880037153709 |
| N  | -2.23686874801450 | -1.16123667735240 | 1.01950724065459  |
| H  | -2.11951688226405 | 0.08995096543942  | -0.39192918698531 |
| O  | -0.14172946504370 | 2.63182149302035  | -0.87683289743059 |
| Fe | -3.45857667270504 | 5.91635456913747  | 3.55967712621686  |
| Sr | -2.54300449553675 | 5.24266737376288  | -0.67463221339463 |
| Fe | -4.93993302366149 | 8.04815490742974  | -3.04208108010988 |

### IMB2\_model-1

**Energy: -1043.71397 (Hartrees)**

| Atomic | Coordinates (Angstroms) |                   |                   |
|--------|-------------------------|-------------------|-------------------|
| Type   | X                       | Y                 | Z                 |
| C      | 6.32472434128488        | -1.50308820328360 | -2.71893790517708 |
| C      | 4.17421599025519        | -0.14475302117451 | -2.00840102012949 |
| C      | 3.53038624088836        | 0.09788781516439  | 0.54443010416956  |
| C      | 5.09659141013032        | -1.01270422471489 | 2.37255107245068  |



|    |                   |                   |                   |
|----|-------------------|-------------------|-------------------|
| C  | 7.24332013316549  | -2.36385846644627 | 1.66220307686765  |
| C  | 7.86088283490382  | -2.62067228651714 | -0.89195073666615 |
| H  | 6.80131351000348  | -1.67429730517035 | -4.70825245333864 |
| H  | 2.99805058989891  | 0.75211100152690  | -3.42569561387469 |
| H  | 4.64948235635547  | -0.80540127825172 | 4.36829085384340  |
| H  | 8.43819422278114  | -3.20818808775504 | 3.10217443135592  |
| H  | 9.53404600204299  | -3.67098199308926 | -1.44847506724868 |
| C  | 1.21622770947943  | 1.57111825685597  | 1.40255476209559  |
| C  | -0.82467647338830 | -0.00850376756247 | 2.80775512942781  |
| H  | 0.05706973086453  | -1.38498032047150 | 4.08691057336062  |
| H  | -1.94906345917797 | 1.29861981199286  | 3.94801585813113  |
| H  | 1.81942836227671  | 3.11351286747438  | 2.63881351369790  |
| C  | -1.72267432420580 | -3.76187780836310 | 0.19653152077879  |
| C  | -5.19202242070550 | -1.20375558697434 | 1.72550893229055  |
| C  | -3.46235630069956 | -4.74529137451661 | -1.88500181346056 |
| H  | -1.79675160342336 | -5.06068651171023 | 1.82698716851092  |
| H  | 0.22695610572200  | -3.69932785850800 | -0.48395885872113 |
| C  | -6.81151792147433 | -2.26672642078940 | -0.41328311676418 |
| H  | -5.47718232918280 | -2.35289803791377 | 3.44175824814261  |
| H  | -5.76631019576023 | 0.74152852577831  | 2.13746933147409  |
| H  | -2.98633414430476 | -6.70078006692574 | -2.35403183768397 |
| H  | -3.22973093534435 | -3.57951916360190 | -3.59652681777958 |
| H  | -8.78533707256919 | -2.41015678107505 | 0.18103575710521  |
| H  | -6.70569326981305 | -0.99324008153225 | -2.05885651869421 |
| O  | -6.02690364382562 | -4.74056695148974 | -1.09830883140518 |
| N  | -2.51598143273633 | -1.20129887309199 | 0.95620138523169  |
| O  | -0.06519554942255 | 2.71307990914714  | -0.72773354396311 |
| Fe | -1.33112308811466 | 6.17486919941262  | -0.59469682476357 |
| H  | -1.46604950887277 | 1.49023807508228  | -1.04558550842265 |
| Fe | -1.79618470259339 | 7.28640582834411  | 3.62071527249525  |
| Fe | -2.54867371359598 | 9.60283263392566  | -3.04170307252392 |

## IMB2\_model-2

**Energy: -950.605232 (Hartrees)**

Atomic Coordinates (Angstroms)

| Type | X                 | Y                 | Z                 |
|------|-------------------|-------------------|-------------------|
| C    | 6.32472434128488  | -1.50308820328360 | -2.71893790517708 |
| C    | 4.17421599025519  | -0.14475302117451 | -2.00840102012949 |
| C    | 3.53038624088836  | 0.09788781516439  | 0.54443010416956  |
| C    | 5.09659141013032  | -1.01270422471489 | 2.37255107245068  |
| C    | 7.24332013316549  | -2.36385846644627 | 1.66220307686765  |
| C    | 7.86088283490382  | -2.62067228651714 | -0.89195073666615 |
| H    | 6.80131351000348  | -1.67429730517035 | -4.70825245333864 |
| H    | 2.99805058989891  | 0.75211100152690  | -3.42569561387469 |
| H    | 4.64948235635547  | -0.80540127825172 | 4.36829085384340  |
| H    | 8.43819422278114  | -3.20818808775504 | 3.10217443135592  |
| H    | 9.53404600204299  | -3.67098199308926 | -1.44847506724868 |
| C    | 1.21622770947943  | 1.57111825685597  | 1.40255476209559  |
| C    | -0.82467647338830 | -0.00850376756247 | 2.80775512942781  |
| H    | 0.05706973086453  | -1.38498032047150 | 4.08691057336062  |
| H    | -1.94906345917797 | 1.29861981199286  | 3.94801585813113  |
| H    | 1.81942836227671  | 3.11351286747438  | 2.63881351369790  |
| C    | -1.72267432420580 | -3.76187780836310 | 0.19653152077879  |
| C    | -5.19202242070550 | -1.20375558697434 | 1.72550893229055  |
| C    | -3.46235630069956 | -4.74529137451661 | -1.88500181346056 |
| H    | -1.79675160342336 | -5.06068651171023 | 1.82698716851092  |
| H    | 0.22695610572200  | -3.69932785850800 | -0.48395885872113 |
| C    | -6.81151792147433 | -2.26672642078940 | -0.41328311676418 |
| H    | -5.47718232918280 | -2.35289803791377 | 3.44175824814261  |
| H    | -5.76631019576023 | 0.74152852577831  | 2.13746933147409  |
| H    | -2.98633414430476 | -6.70078006692574 | -2.35403183768397 |
| H    | -3.22973093534435 | -3.57951916360190 | -3.59652681777958 |
| H    | -8.78533707256919 | -2.41015678107505 | 0.18103575710521  |
| H    | -6.70569326981305 | -0.99324008153225 | -2.05885651869421 |
| O    | -6.02690364382562 | -4.74056695148974 | -1.09830883140518 |
| N    | -2.51598143273633 | -1.20129887309199 | 0.95620138523169  |
| O    | -0.06519554942255 | 2.71307990914714  | -0.72773354396311 |
| Fe   | -1.33112308811466 | 6.17486919941262  | -0.59469682476357 |
| H    | -1.46604950887277 | 1.49023807508228  | -1.04558550842265 |
| Fe   | -1.79618470259339 | 7.28640582834411  | 3.62071527249525  |

Sr -2.54867371359598 9.60283263392566 -3.04170307252392

### IMB2\_model-3

Energy: -950.560853 (Hartrees)

| Atomic | Coordinates (Angstroms) |                   |                   |
|--------|-------------------------|-------------------|-------------------|
| Type   | X                       | Y                 | Z                 |
| C      | 6.32472434128488        | -1.50308820328360 | -2.71893790517708 |
| C      | 4.17421599025519        | -0.14475302117451 | -2.00840102012949 |
| C      | 3.53038624088836        | 0.09788781516439  | 0.54443010416956  |
| C      | 5.09659141013032        | -1.01270422471489 | 2.37255107245068  |
| C      | 7.24332013316549        | -2.36385846644627 | 1.66220307686765  |
| C      | 7.86088283490382        | -2.62067228651714 | -0.89195073666615 |
| H      | 6.80131351000348        | -1.67429730517035 | -4.70825245333864 |
| H      | 2.99805058989891        | 0.75211100152690  | -3.42569561387469 |
| H      | 4.64948235635547        | -0.80540127825172 | 4.36829085384340  |
| H      | 8.43819422278114        | -3.20818808775504 | 3.10217443135592  |
| H      | 9.53404600204299        | -3.67098199308926 | -1.44847506724868 |
| C      | 1.21622770947943        | 1.57111825685597  | 1.40255476209559  |
| C      | -0.82467647338830       | -0.00850376756247 | 2.80775512942781  |
| H      | 0.05706973086453        | -1.38498032047150 | 4.08691057336062  |
| H      | -1.94906345917797       | 1.29861981199286  | 3.94801585813113  |
| H      | 1.81942836227671        | 3.11351286747438  | 2.63881351369790  |
| C      | -1.72267432420580       | -3.76187780836310 | 0.19653152077879  |
| C      | -5.19202242070550       | -1.20375558697434 | 1.72550893229055  |
| C      | -3.46235630069956       | -4.74529137451661 | -1.88500181346056 |
| H      | -1.79675160342336       | -5.06068651171023 | 1.82698716851092  |
| H      | 0.22695610572200        | -3.69932785850800 | -0.48395885872113 |
| C      | -6.81151792147433       | -2.26672642078940 | -0.41328311676418 |
| H      | -5.47718232918280       | -2.35289803791377 | 3.44175824814261  |
| H      | -5.76631019576023       | 0.74152852577831  | 2.13746933147409  |
| H      | -2.98633414430476       | -6.70078006692574 | -2.35403183768397 |
| H      | -3.22973093534435       | -3.57951916360190 | -3.59652681777958 |
| H      | -8.78533707256919       | -2.41015678107505 | 0.18103575710521  |
| H      | -6.70569326981305       | -0.99324008153225 | -2.05885651869421 |
| O      | -6.02690364382562       | -4.74056695148974 | -1.09830883140518 |

|    |                   |                   |                   |
|----|-------------------|-------------------|-------------------|
| N  | -2.51598143273633 | -1.20129887309199 | 0.95620138523169  |
| O  | -0.06519554942255 | 2.71307990914714  | -0.72773354396311 |
| H  | -1.46604950887277 | 1.49023807508228  | -1.04558550842265 |
| Fe | -1.79618470259339 | 7.28640582834411  | 3.62071527249525  |
| Sr | -1.33112308811466 | 6.17486919941262  | -0.59469682476357 |
| Fe | -2.54867371359598 | 9.60283263392566  | -3.04170307252392 |

## Product 6

**Energy: -672.058276 (Hartrees)**

| Atomic | Coordinates (Angstroms) |                   |                   |
|--------|-------------------------|-------------------|-------------------|
| Type   | X                       | Y                 | Z                 |
| C      | 5.93581859893654        | -0.41328311676418 | 2.42017218780805  |
| C      | 3.61240044919939        | 0.66140413240940  | 1.79429500103484  |
| C      | 2.63711270349362        | 0.42518836678520  | -0.66216003608748 |
| C      | 4.05818692523333        | -0.89780890277144 | -2.46231308984404 |
| C      | 6.38500647050162        | -1.97230711886129 | -1.83813660178126 |
| C      | 7.32835795240939        | -1.73817005953349 | 0.61170436744741  |
| H      | 6.66619797301369        | -0.20522425339485 | 4.32747275442573  |
| H      | 2.56209074262727        | 1.73533544955901  | 3.18721202572240  |
| H      | 3.33536658415752        | -1.08640349445676 | -4.37641689727883 |
| H      | 7.45629223910638        | -2.98671215378045 | -3.26525782428876 |
| H      | 9.13777022954141        | -2.57097235147980 | 1.10662365470104  |
| C      | 0.12150939172681        | 1.59379501759905  | -1.42315270315870 |
| C      | -0.08258102788277       | 4.41080976346535  | -0.63400311871480 |
| O      | -0.67519916902665       | 4.65628514741776  | 1.96399229556542  |
| H      | 1.71983971423132        | 5.36153082199208  | -0.98775986821086 |
| H      | -1.52009574596745       | 5.35038161548887  | -1.81073553139488 |
| H      | 0.01398397332495        | 1.51990674122961  | -3.50865439045094 |
| C      | -4.49546957512328       | 1.12174138055304  | -1.43014472383624 |
| C      | -1.98062194215715       | -2.48007653431624 | -0.18065782132884 |
| C      | -6.59778979847180       | -0.82429852249412 | -0.92010765403883 |
| H      | -4.32180353636650       | 1.39688554403636  | -3.49448156923541 |
| H      | -5.01495521129498       | 2.94683884750541  | -0.60546825044795 |
| C      | -4.04155727864160       | -3.40150693428161 | 1.64689634627781  |
| H      | -2.20833387974764       | -3.35879924668895 | -2.06169112866869 |

|   |                   |                   |                   |
|---|-------------------|-------------------|-------------------|
| H | -0.14154048865175 | -3.07779697379213 | 0.53176892212457  |
| H | -6.62726946177101 | -2.27882064720237 | -2.40883397845673 |
| H | -8.44348543325441 | 0.10431288020992  | -0.93239088329992 |
| H | -3.38582230948937 | -3.22765211755411 | 3.60125101592905  |
| H | -4.45427346811965 | -5.40764013188302 | 1.27348645075099  |
| N | -2.08172239566897 | 0.27986844667046  | -0.30122234621370 |
| O | -6.30223669866321 | -1.93564643014669 | 1.49288367842918  |
| H | -1.66333698813169 | 3.14677193389070  | 2.34401620418383  |
